# Supplementary material for: Copper(ii) complexes of macrocyclic and open-chain pseudopeptidic ligands: synthesis, characterization and interaction with dicarboxylates
Source: Royal Society of Chemistry journal article supplement (doi:10.1039/c5dt01496d), 2015-01-01
Supplement: c5dt01496d1.pdf [file c5dt01496d1.pdf]

Supporting Information for:

**Copper(II) complexes of macrocyclic and open-chain  
pseudopeptidic ligands: synthesis, characterization and  
interaction with dicarboxylates**

Enrico Faggi,<sup>\*a</sup> Raquel Gavara,<sup>b</sup> Michael Bolte,<sup>c</sup> Lluís Fajarí,<sup>a</sup>  
Luís Julià,<sup>a</sup> Laura Rodríguez<sup>b</sup> and Ignacio Alfonso<sup>\*a</sup>

<sup>a</sup> Departamento de Química Biológica y Modelización Molecular, IQAC-CSIC, Jordi Girona, 16-26, E-08034 Barcelona, Spain.

<sup>b</sup> Departament de Química Inorgànica, Universitat de Barcelona, Martí i Franquès 1-11, E-08028 Barcelona, Spain

<sup>c</sup> Institut für Anorganische Chemie, J.-W.-Goethe-Universität, Max-von-Laue-Str.7, D-60438 Frankfurt/Main, Germany.

**Table of Contents**

- 1. Synthesis and Characterization of the ligands**
- 2. Synthesis and Characterization of the Cu(II) complexes**
- 3. IR spectra**
- 4. X-rays Crystallographic Analysis**
- 5. EPR spectra**
- 6. UV-vis titrations**
- 7. NMR spectra (Cu(II) complexes and dicarboxylates)**

# 1. Synthesis and Characterization of the ligands

## L1

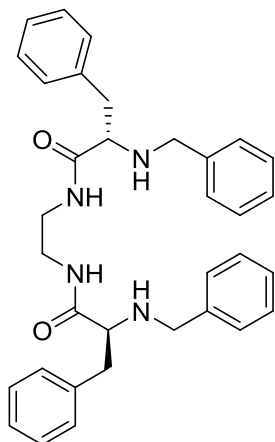

To a solution of **1** (360 mg, 1.01 mmol) in methanol (15 ml) was added benzaldehyde (454  $\mu$ l, 4.46 mmol) and the resulting solution was stirred at room temperature during 6 hours. Sodium borohydride (470 mg, 12.2 mmol) was added in an ice bath that was later removed and the reaction mixture was stirred at room temperature during 16 hours. Aqueous 4M HCl was added, and a white solid formed. After 1 hour the solvents were evaporated at reduced pressure, affording a solid that was suspended in aqueous 4M NaOH. The product was extracted twice with DCM and once with AcOEt. Organic layers were combined, dried over MgSO<sub>4</sub> and concentrated at reduced pressure. The resulting thick oil was suspended in diethyl ether, triturated, filtered and washed with additional diethyl ether, affording **L1** as a white solid (440 mg, 0.82 mmol, 81% yield).

<sup>1</sup>H-NMR (400 MHz, CDCl<sub>3</sub>)  $\delta$  7.29 (bs, 2H), 7.26-7.15 (m, 12H), 7.12-7.09 (m, 4H), 7.05 (dd,  $J$  = 7.5, 1.9 Hz, 4H), 3.66 (d,  $J$  = 13.4 Hz, 2H), 3.48 (d,  $J$  = 13.4 Hz, 2H), 3.37-3.21 (m, 4H), 3.29 (dd,  $J$  = 9.1, 4.8 Hz, 2H), 3.13 (dd,  $J$  = 13.8, 4.7 Hz, 2H), 2.71 (dd,  $J$  = 13.8, 9.1 Hz, 2H), 1.65 (bs, 2H).

<sup>13</sup>C-NMR (101 MHz, CDCl<sub>3</sub>)  $\delta$  174.4, 139.2, 137.5, 129.3, 128.8, 128.6, 128.0, 127.3, 127.0, 63.2, 52.7, 39.5, 39.3.

HRMS (ESI-TOF)  $m/z$  [**L1** + H]<sup>+</sup> Calcd for (C<sub>34</sub>H<sub>39</sub>N<sub>4</sub>O<sub>2</sub>) 535.3073, found 535.3080.

IR (KBr,  $\nu$  cm<sup>-1</sup>): 3345, 3282, 1652, 1522, 745, 697.

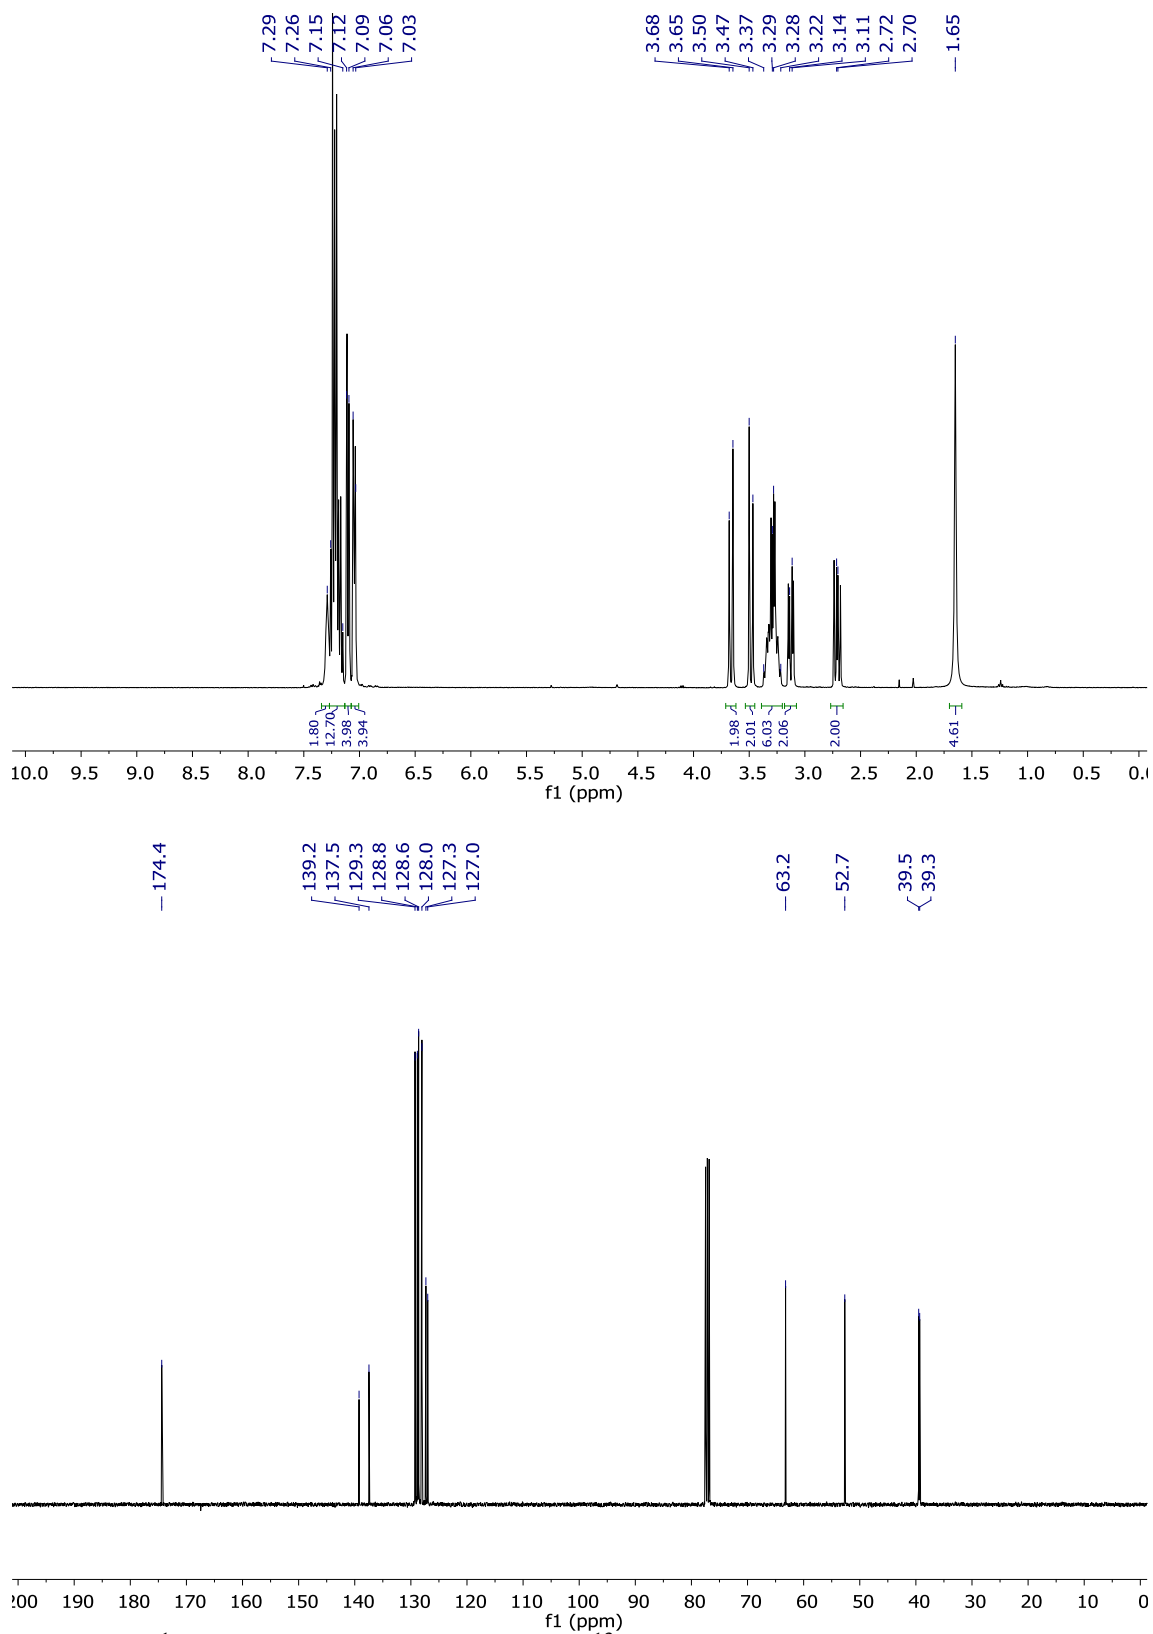

**Figure S1.**  $^1\text{H-NMR}$  (400 MHz,  $\text{CDCl}_3$ ) and  $^{13}\text{C-NMR}$  (101 MHz,  $\text{CDCl}_3$ ) spectra of **L1**.

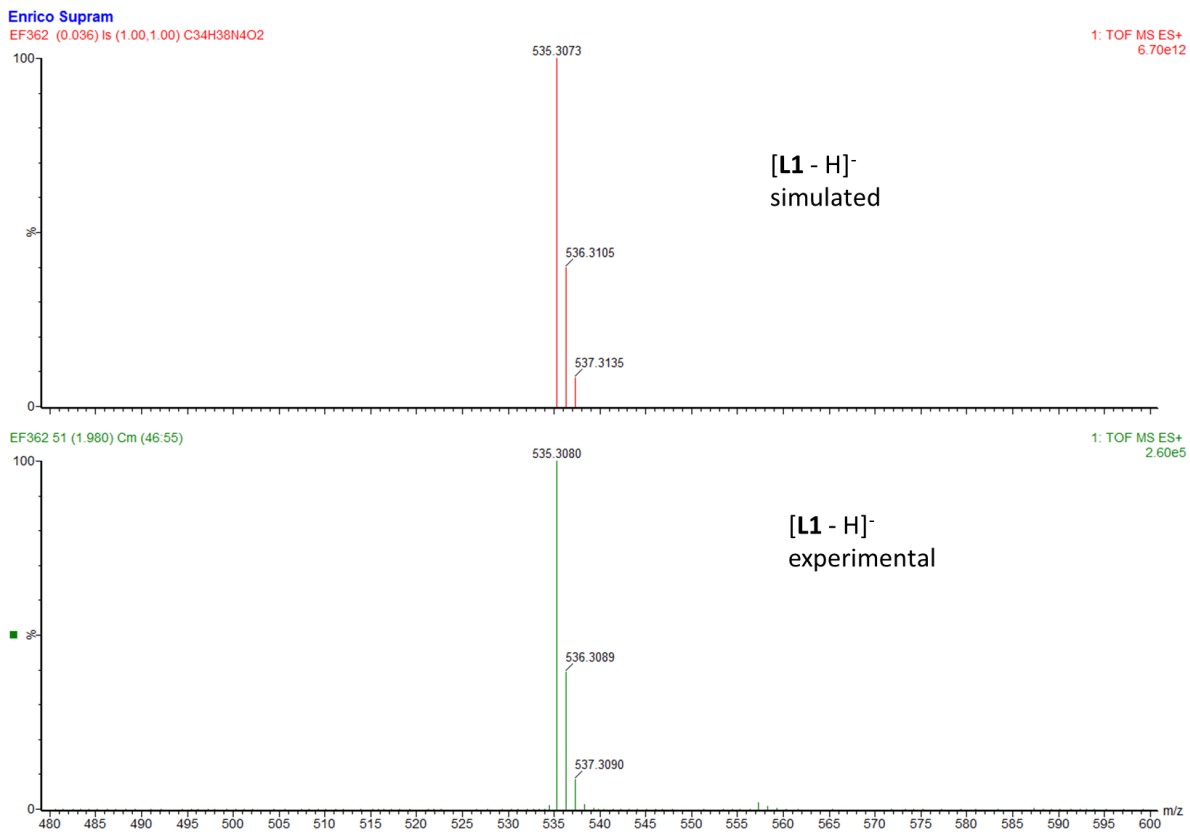

**Figure S2.** HRMS (ESI-TOF) spectrum of **L1**.

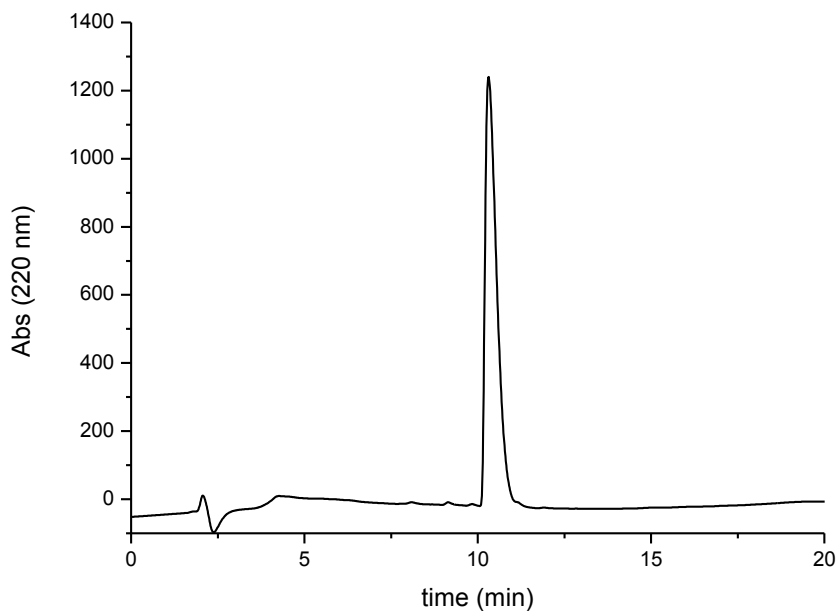

**Figure S3.** HPLC trace of **L1** (0% to 100% MeCN in water, in 20 min);  $t_R$  = 10.31.

## L2

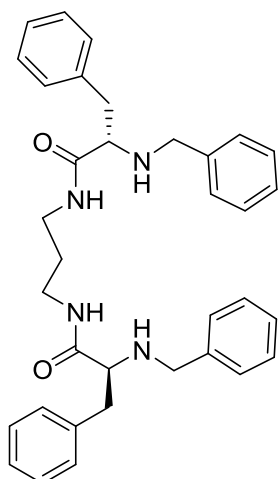

Obtained following the same procedure described for **L1**, using **2** (400 mg, 0.82 mmol) as starting material. **L2** was obtained as a waxy solid (240 mg, 0.82 mmol, 44% yield).

$^1\text{H-NMR}$  (400 MHz,  $\text{CDCl}_3$ )  $\delta$  7.52 (t,  $J = 6.4$  Hz, 2H), 7.35-7.18 (m, 12H), 7.14 (d,  $J = 6.6$  Hz, 4H), 7.07 (d,  $J = 7.4$  Hz, 4H), 3.70 (d,  $J = 13.4$  Hz, 2H), 3.53 (d,  $J = 13.4$  Hz, 2H), 3.36 (dd,  $J = 9.3, 4.4$  Hz, 2H), 3.20-3.09 (m, 6H), 2.73 (dd,  $J = 13.8, 9.3$  Hz, 2H), 1.75 (bs, 2H), 1.54 (p,  $J = 6.4$  Hz, 2H).

$^{13}\text{C-NMR}$  (101 MHz,  $\text{CDCl}_3$ )  $\delta$  174.0, 139.2, 137.4, 129.1, 128.7, 128.5, 128.0, 127.1, 126.8, 63.2, 52.6, 39.4, 35.6, 30.0.

HRMS (ESI-TOF)  $m/z$  [**L2** - H] $^-$  Calcd for ( $\text{C}_{35}\text{H}_{39}\text{N}_4\text{O}_2$ ) 547.3073, found 547.3076.

IR (KBr,  $\nu$   $\text{cm}^{-1}$ ): 3415, 3229, 1638, 1617, 1398.

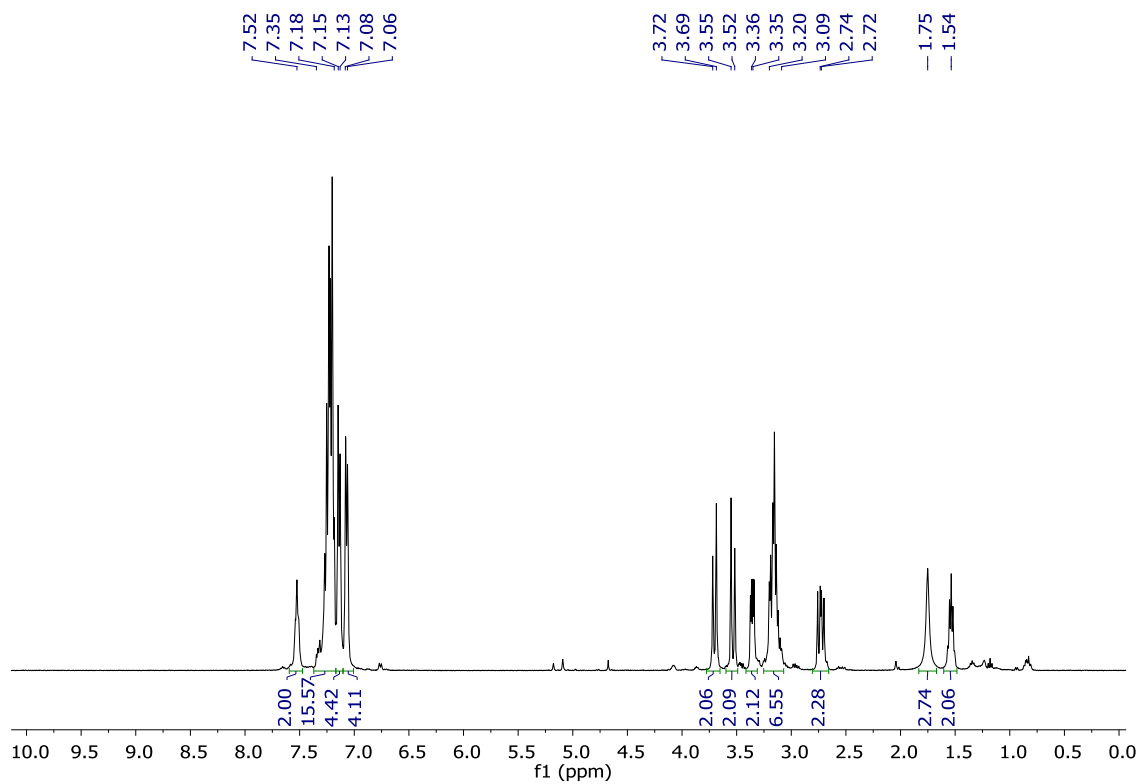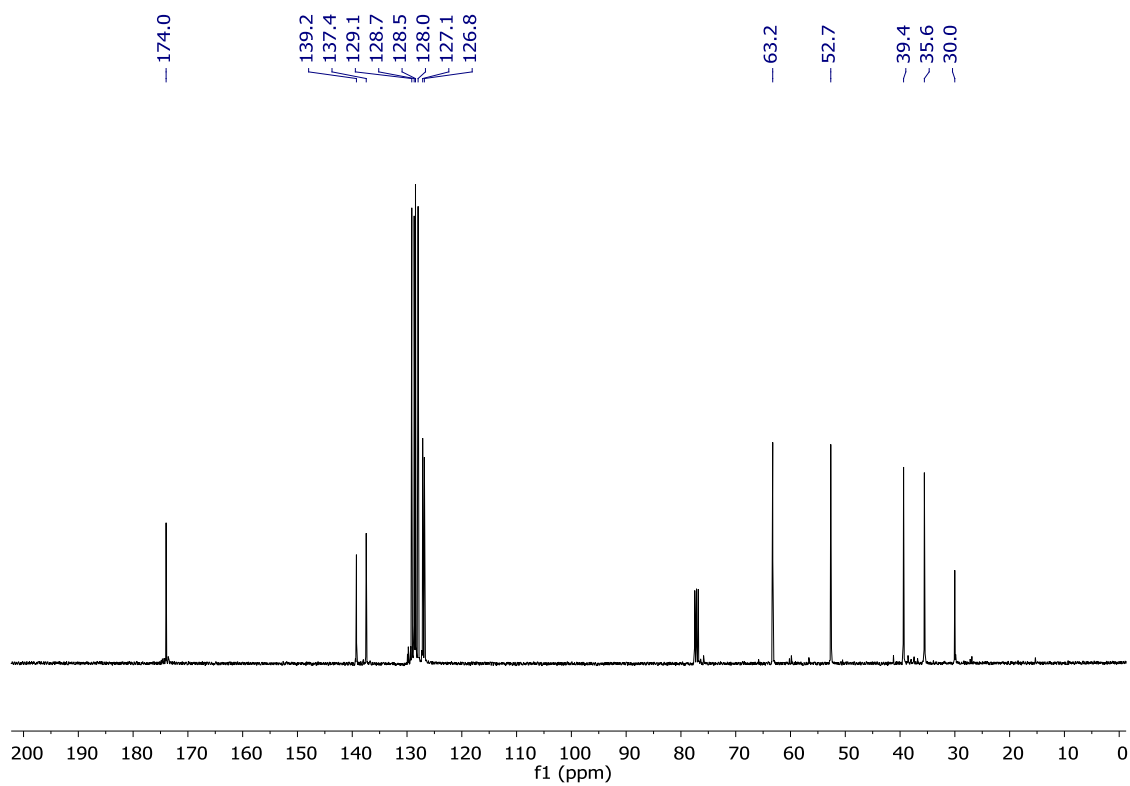

**Figure S4.**  $^1\text{H}$ -NMR (400 MHz,  $\text{CDCl}_3$ ) and  $^{13}\text{C}$ -NMR (101 MHz,  $\text{CDCl}_3$ ) spectra of **L2**.

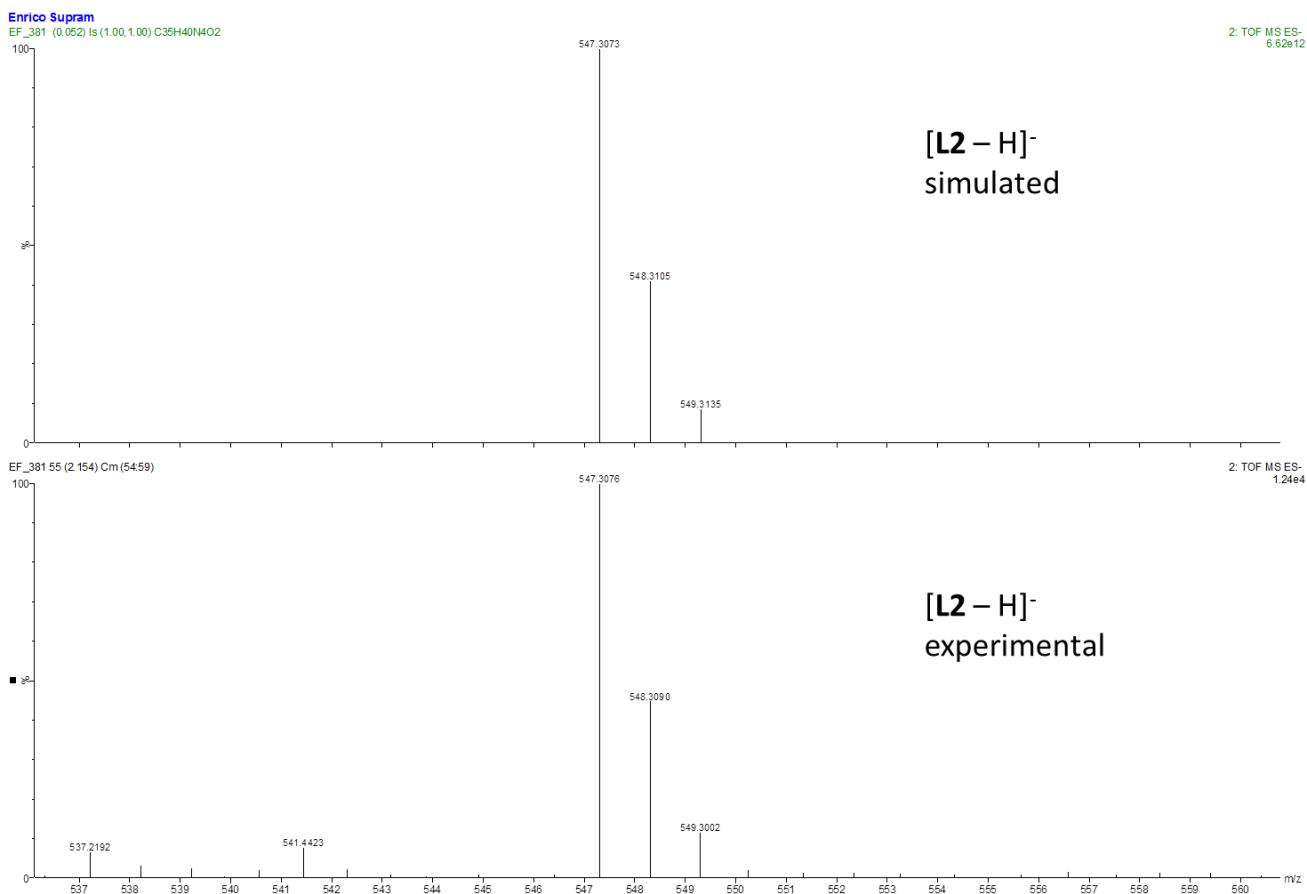

**Figure S5.** HRMS (ESI-TOF) spectrum of **L2**.

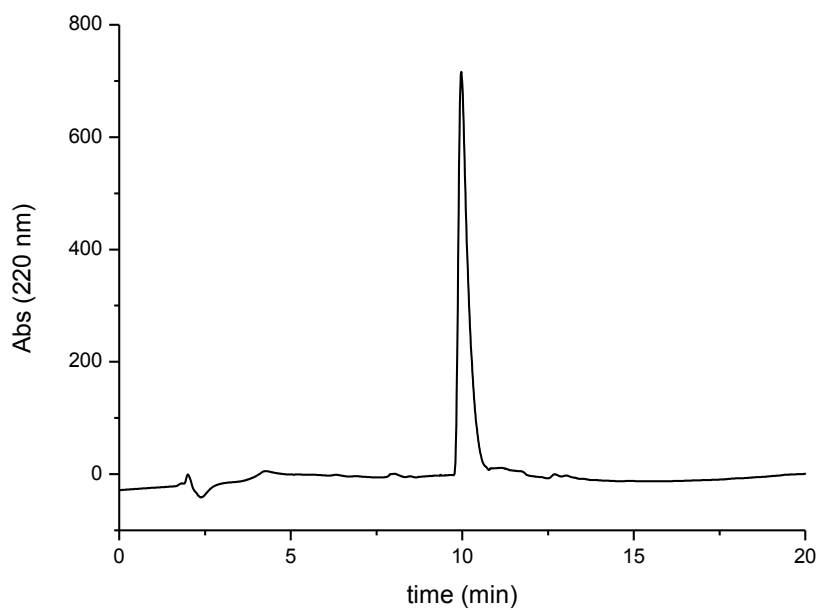

**Figure S6.** HPLC trace of **L2** (0% to 100% MeCN in water, in 20 min);  $t_R = 9.97$ .

### L3

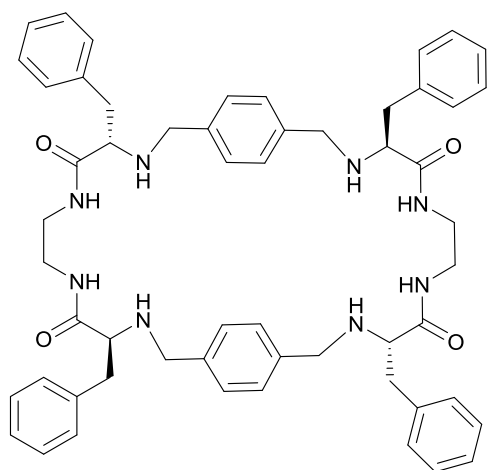

IR (KBr,  $\nu$   $\text{cm}^{-1}$ ): 3415, 1653, 1521, 702.

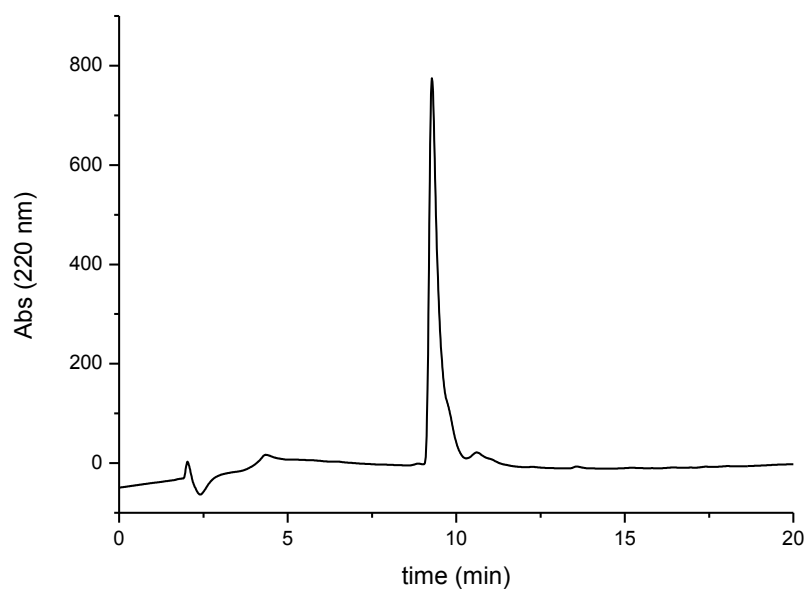

**Figure S7.** HPLC trace of **L3** (0% to 100% MeCN in water, in 20 min);  $t_R = 9.28$ .



**L4**

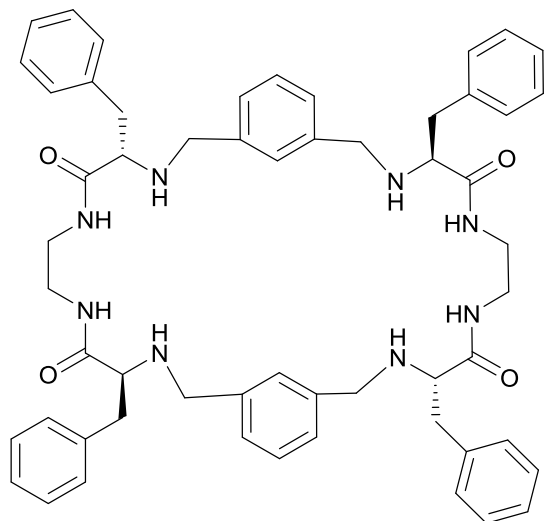

IR (KBr,  $\nu$   $\text{cm}^{-1}$ ): 3417, 3232, 1643, 1520, 1397, 699.

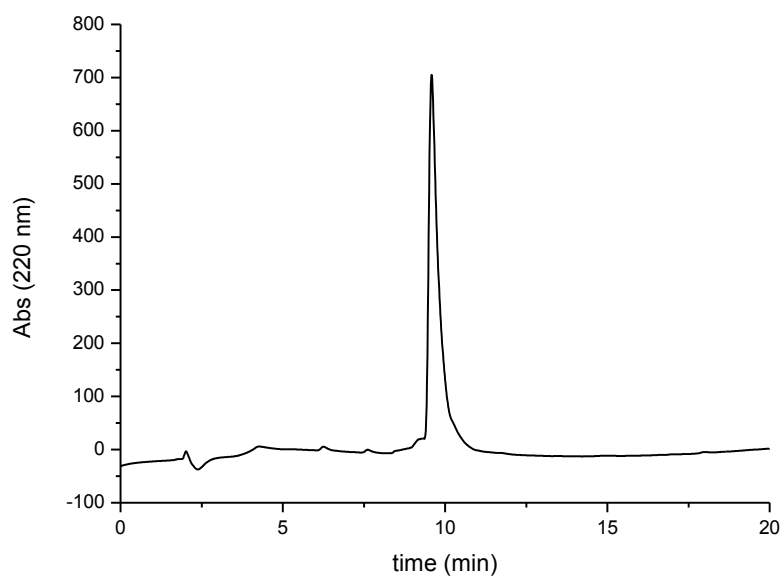

**Figure S8.** HPLC trace of **L4** (0% to 100% MeCN in water, in 20 min);  $t_R = 9.59$ .

## 2. Synthesis and Characterization of the Cu(II) complexes

### CuL1

To a solution of **L1** (105 mg, 0.197 mmol) in MeOH (20 mL) were added CuSO<sub>4</sub>·5H<sub>2</sub>O (50 mg, 0.200 mmol) and NaOH (16 mg, 0.40 mmol). A colour change from blue to purple was observed. Reaction mixture was stirred during 30 minutes at room temperature and then centrifuged during 10 minutes. The white solid was discarded while the purple solution was concentrated at reduced pressure. CuL1 was obtained as a purple solid (94 mg, 0.157 mmol, 80% yield).

IR (KBr,  $\nu$  cm<sup>-1</sup>): 3406, 1598, 1454, 751, 700.

Elemental analysis: found: C: 64.75%, H: 5.93%; N: 8.75%; calculated for CuL1 + 2 H<sub>2</sub>O; C: 64.59%, H: 6.38%, N: 8.86%.

### CuL2

Prepared following the same procedure described for CuL1. CuL2 was obtained as a pink solid. 76% yield.

IR (KBr,  $\nu$  cm<sup>-1</sup>): 3405, 3229, 1576, 1398.

Elemental analysis: found: C: 63.86%, H: 6.25%; N: 8.43%; calculated for CuL2 + 3 H<sub>2</sub>O; C: 63.28%, H: 6.68%, N: 8.43%.

### Cu<sub>2</sub>L3

To a solution of **L3** (215 mg, 0.228 mmol) in MeOH (25 mL) were added CuSO<sub>4</sub>·5H<sub>2</sub>O (115 mg, 0.46 mmol) and NaOH (37 mg, 0.92 mmol). A colour change from blue to purple was observed. Reaction mixture was stirred during 30 minutes at room temperature and then centrifuged during 10 minutes. The white solid was discarded while the purple solution was concentrated at reduced pressure. Cu<sub>2</sub>L3 was obtained as a purple solid (175 mg, 0.164 mmol, 72% yield).

IR (KBr,  $\nu$  cm<sup>-1</sup>): 3404, 1599, 702.

Elemental analysis: found: C: 64.15%, H: 6.21%; N: 10.43%; calculated for: Cu<sub>2</sub>L3 + 1 H<sub>2</sub>O; C: 63.80%, H: 5.93%, N: 10.63%.

### Cu<sub>2</sub>L4

Prepared following the same procedure described for Cu<sub>2</sub>L3. Cu<sub>2</sub>L4 was obtained as a pink solid. 81% yield.

IR (KBr,  $\nu$  cm<sup>-1</sup>): 3414, 3229, 1614, 1397.

Elemental analysis: found: C: 63.75%, H: 5.95%; N: 10.38%; calculated for Cu<sub>2</sub>L4 + 1 H<sub>2</sub>O; C: 63.80%, H: 5.93%, N: 10.63%.

# HRMS Spectra of the Cu(II) Complexes

## CuL1

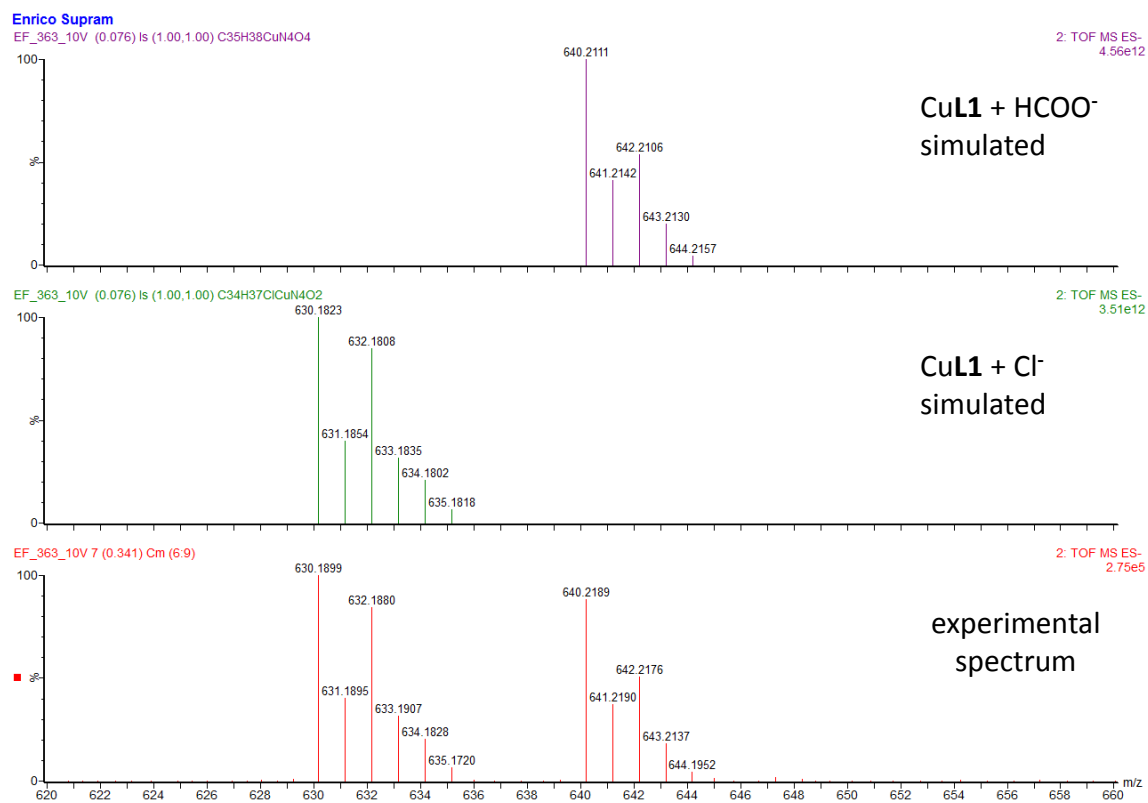

**Figure S9.** HRMS (ESI-TOF) spectrum of CuL1.

# CuL2

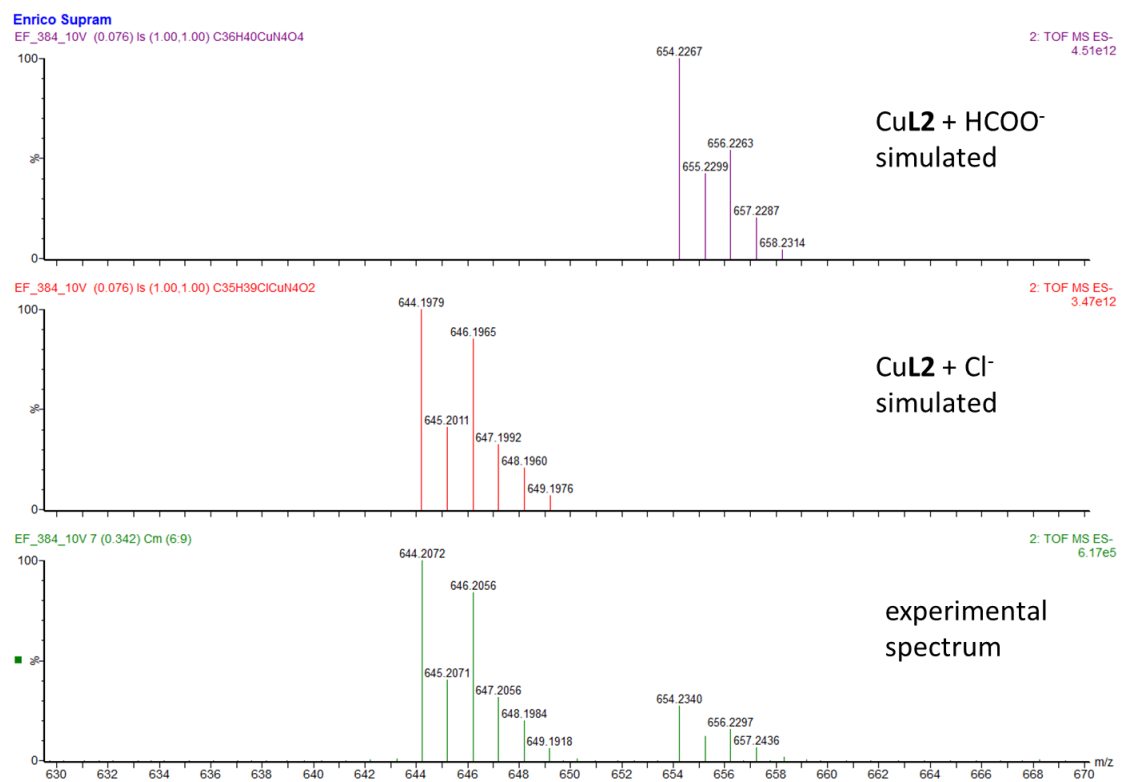

**Figure S10.** HRMS (ESI-TOF) spectrum of CuL2.

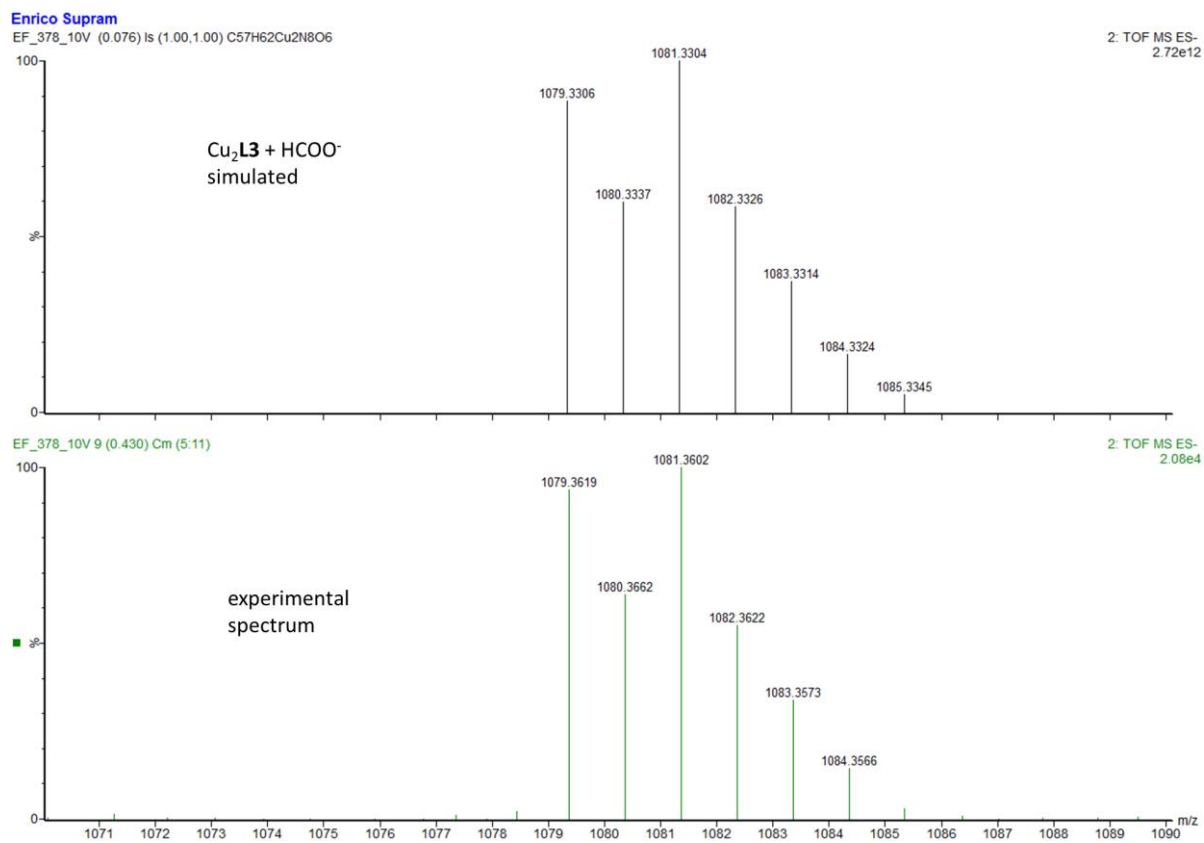

**Figure S11.** HRMS (ESI-TOF) spectrum of Cu<sub>2</sub>L3.

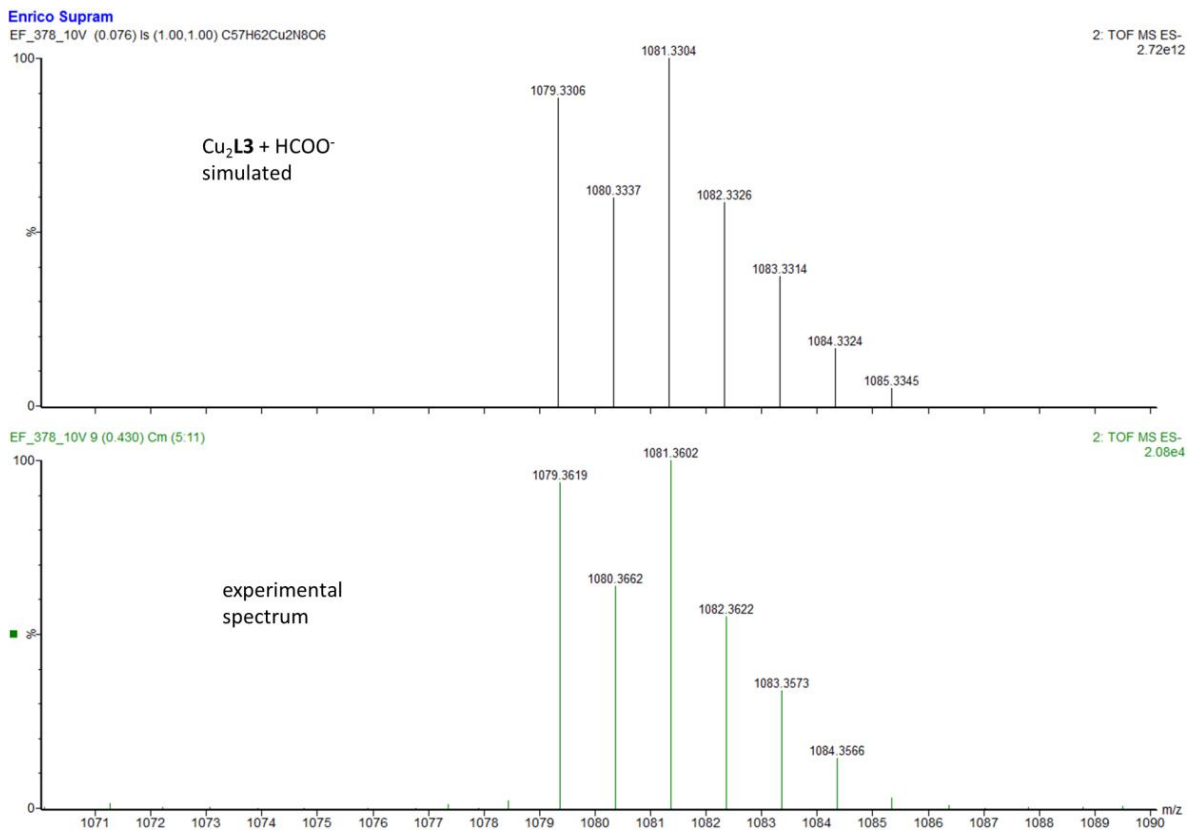

**Figure S12.** HRMS (ESI-TOF) spectrum of Cu<sub>2</sub>L4.

## UV-vis Spectra of the Cu(II) Complexes

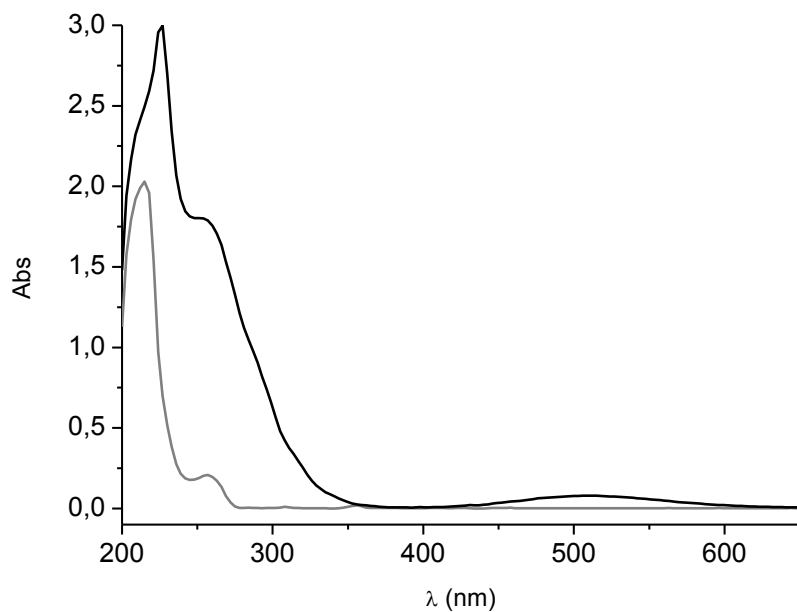

**Figure S13.** UV-vis spectra of CuL1 (black line) and L1 (grey line) ( $3.5 \cdot 10^{-4}$  M, MeOH).

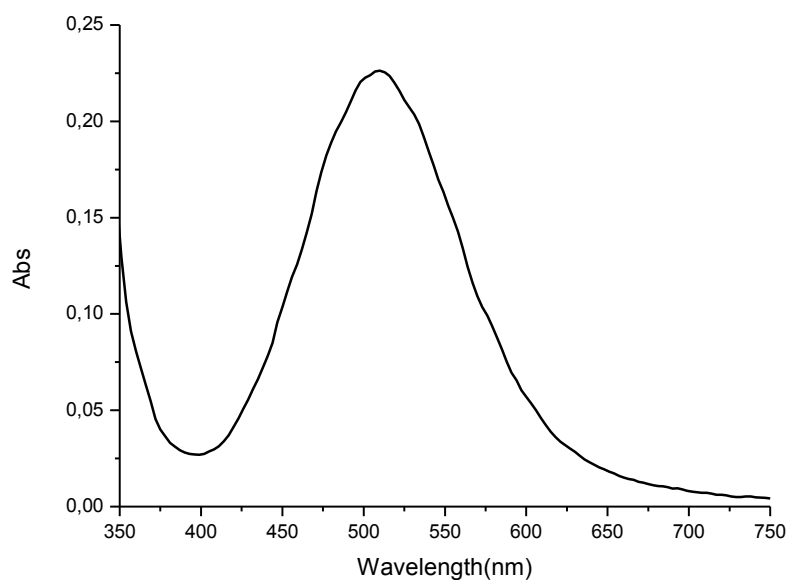

**Figure S14.** UV-vis spectrum of CuL1,  $1 \cdot 10^{-3}$  M, MeOH. ( $\lambda_{\max} = 510$  nm;  $\epsilon = 226$  M $^{-1}$  cm $^{-1}$ ).

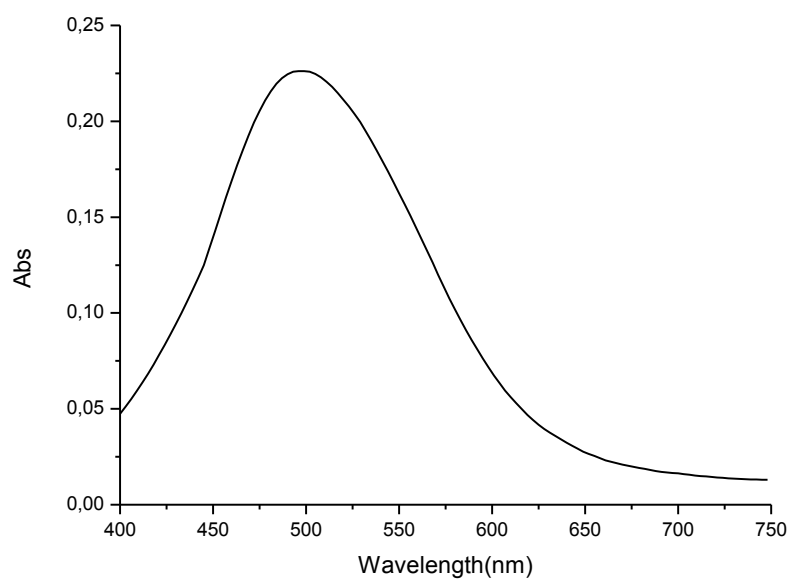

**Figure S15.** UV-vis spectrum of CuL2,  $2,4 \cdot 10^{-3}$  M, MeOH. ( $\lambda_{\text{max}} = 498$  nm;  $\epsilon = 94 \text{ M}^{-1} \text{ cm}^{-1}$ ).

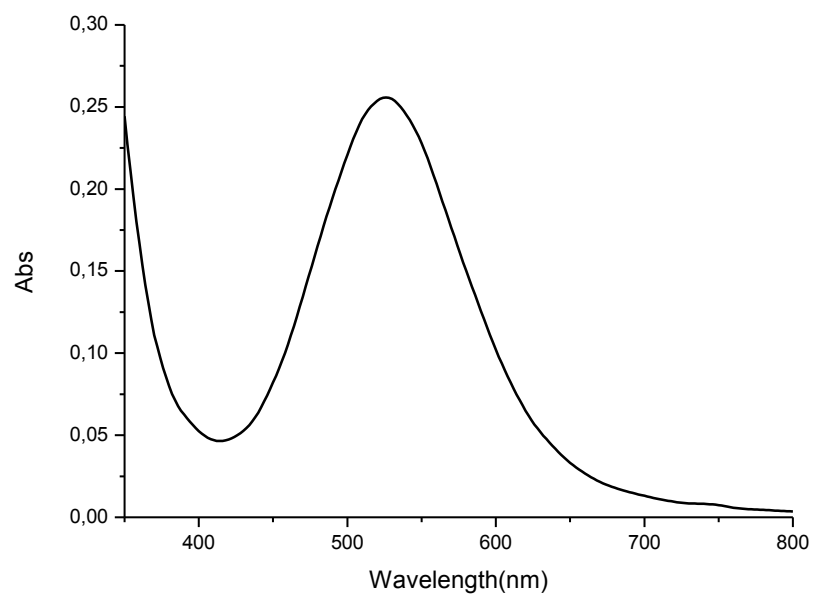

**Figure S16.** UV-vis spectrum of Cu<sub>2</sub>L3,  $7 \cdot 10^{-4}$  M, MeOH. ( $\lambda_{\text{max}} = 526$  nm;  $\epsilon = 365 \text{ M}^{-1} \text{ cm}^{-1}$ ).



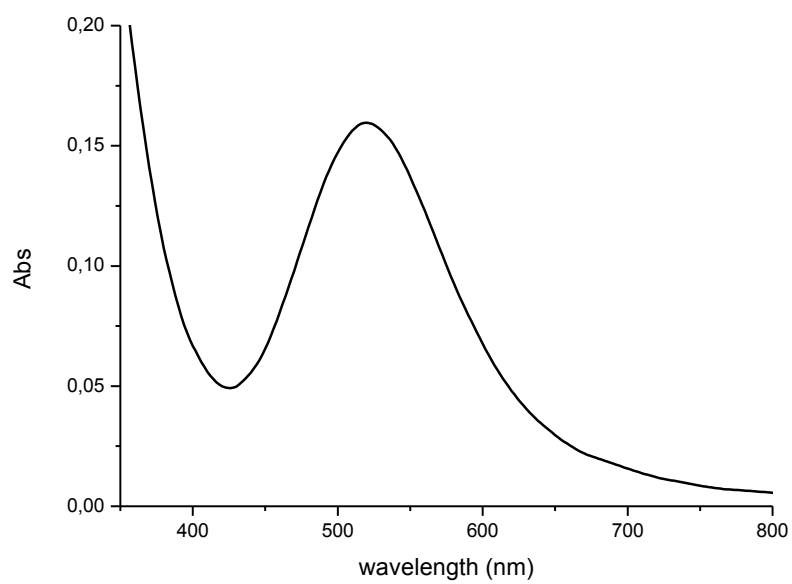

**Figure S17.** UV-vis spectrum of Cu<sub>2</sub>L4,  $5 \cdot 10^{-4}$  M, MeOH. ( $\lambda_{\text{max}} = 519$  nm;  $\epsilon = 319$  M<sup>-1</sup> cm<sup>-1</sup>).

### 3. IR spectra

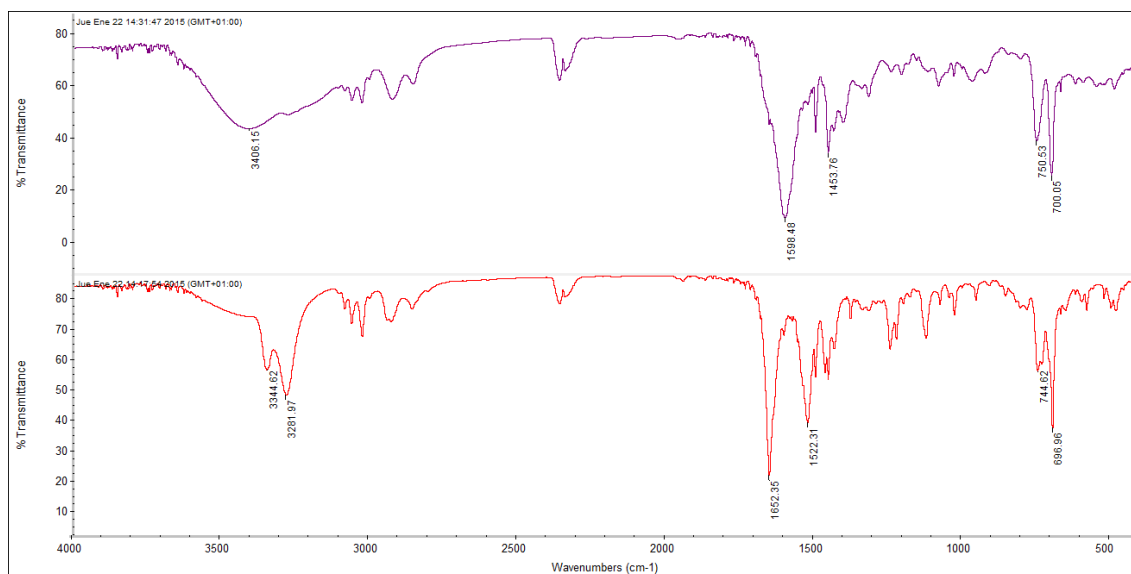

**Figure S18.** Infrared spectra of **L1** (red line) and **CuL1** (purple line).

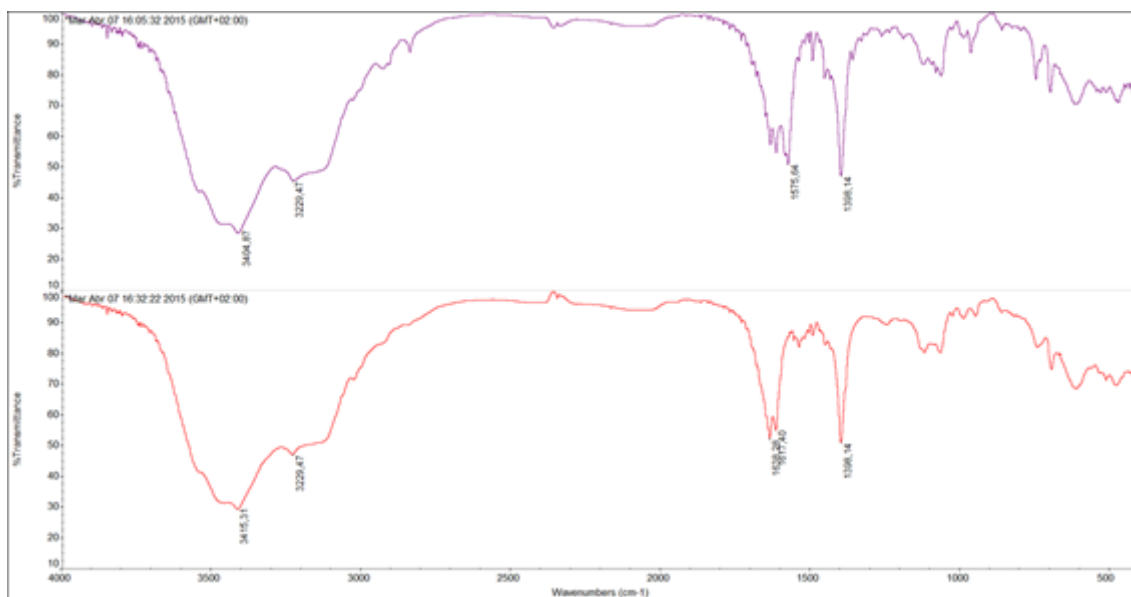

**Figure S19.** Infrared spectra of **L2** (red line) and **CuL2** (purple line).

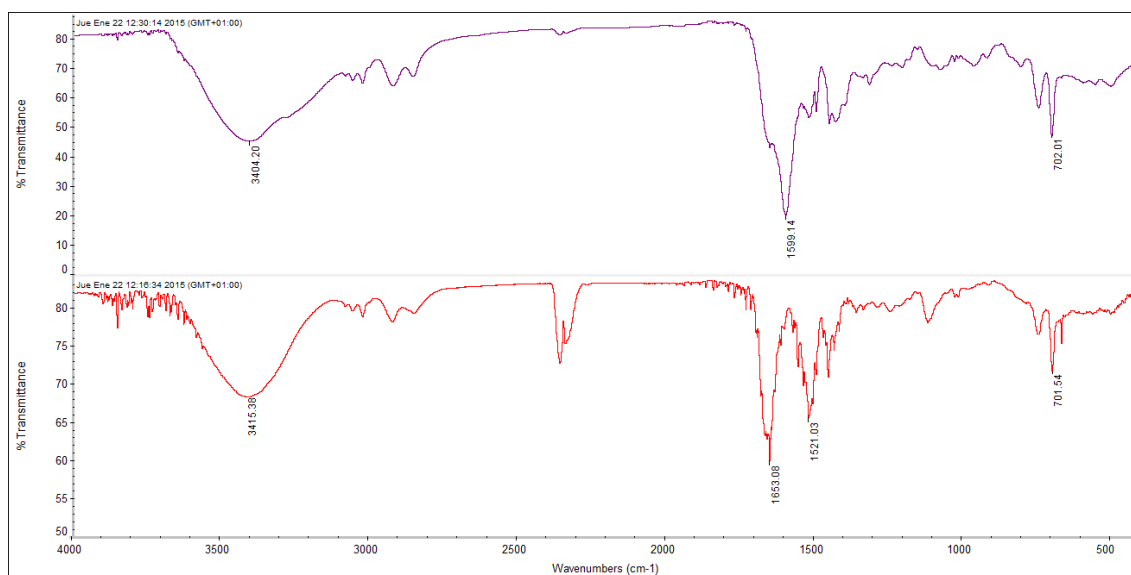

**Figure S20.** Infrared spectra of **L3** (red line) and  $\text{Cu}_2\text{L3}$  (purple line).

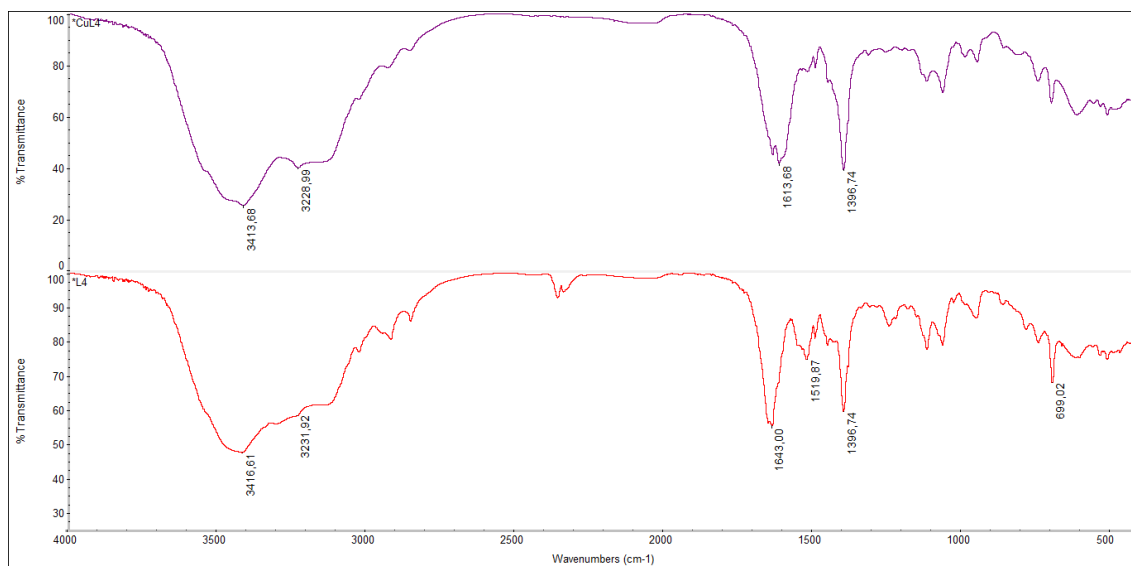

**Figure S21.** Infrared spectra of **L4** (red line) and  $\text{Cu}_2\text{L4}$  (purple line).

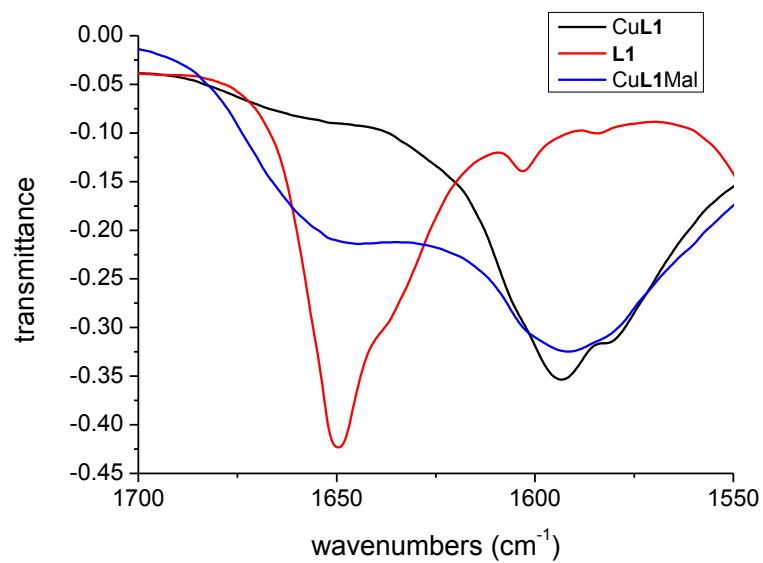

**Figure S22.** ATR-IR spectra of **L1** (red), **CuL1** (black) and **CuL1** plus (TBA)<sub>2</sub>-L-malate (1:1) (blue).

## 4. X-rays Crystallographic Analysis

**Table S1.** Crystal data and structure refinement for **L1** and **CuL2**.

| Compounds                         | <b>L1</b>                                                                                               | <b>CuL2</b>                                                                                 |
|-----------------------------------|---------------------------------------------------------------------------------------------------------|---------------------------------------------------------------------------------------------|
| Empirical formula                 | C <sub>34</sub> H <sub>38</sub> N <sub>4</sub> O <sub>2</sub>                                           | C <sub>36</sub> H <sub>42</sub> Cu N <sub>4</sub> O <sub>3</sub>                            |
| Formula weight                    | 534.68                                                                                                  | 642.27                                                                                      |
| Temperature                       | 173(2) K                                                                                                | 173(2) K                                                                                    |
| Wavelength                        | 0.71073 Å                                                                                               | 0.71073 Å                                                                                   |
| Crystal system                    | Triclinic                                                                                               | Orthorhombic                                                                                |
| Space group                       | P 1                                                                                                     | P 21 21 21                                                                                  |
| Unit cell dimensions              | a = 9.631(3) Å<br>b = 10.027(3) Å<br>c = 15.551(4) Å<br>α = 86.83(2)°<br>β = 87.67(2)°<br>γ = 78.27(2)° | a = 10.0943(8) Å<br>b = 15.9068(10) Å<br>c = 19.5472(13) Å<br>α = 90°<br>β = 90°<br>γ = 90° |
| Volume                            | 1467.5(7) Å <sup>3</sup>                                                                                | 3138.7(4) Å <sup>3</sup>                                                                    |
| Z                                 | 2                                                                                                       | 4                                                                                           |
| Density (calculated)              | 1.210 Mg/m <sup>3</sup>                                                                                 | 1.359 Mg/m <sup>3</sup>                                                                     |
| Absorption coefficient            | 0.076 mm <sup>-1</sup>                                                                                  | 0.739 mm <sup>-1</sup>                                                                      |
| F(000)                            | 572                                                                                                     | 1356                                                                                        |
| Crystal size                      | 0.170 x 0.090 x 0.030 mm <sup>3</sup>                                                                   | 0.260 x 0.220 x 0.190 mm <sup>3</sup>                                                       |
| Theta range for data collection   | 3.286 to 25.026°                                                                                        | 3.302 to 25.659°                                                                            |
| Index ranges                      | -11 ≤ h ≤ 11<br>-11 ≤ k ≤ 11<br>-18 ≤ l ≤ 18                                                            | -11 ≤ h ≤ 12<br>-19 ≤ k ≤ 16<br>-23 ≤ l ≤ 23                                                |
| Reflections collected             | 11889                                                                                                   | 13262                                                                                       |
| Independent reflections           | 8265 [R(int) = 0.1832]                                                                                  | 5861 [R(int) = 0.0591]                                                                      |
| Completeness to theta = 25.000°   | 99.1 %                                                                                                  | 99.6 %                                                                                      |
| Absorption correction             | Semi-empirical from equivalents                                                                         |                                                                                             |
| Refinement method                 | Full-matrix least-squares on F <sup>2</sup>                                                             |                                                                                             |
| Data / restraints / parameters    | 8265 / 3 / 721                                                                                          | 5861 / 0 / 410                                                                              |
| Goodness-of-fit on F <sup>2</sup> | 1.064                                                                                                   | 1.002                                                                                       |
| Final R indices [I > 2σ(I)]       | R1 = 0.1479, wR2 = 0.3701                                                                               | R1 = 0.0365, wR2 = 0.0799                                                                   |
| R indices (all data)              | R1 = 0.2342, wR2 = 0.4177                                                                               | R1 = 0.0439, wR2 = 0.0821                                                                   |
| Absolute structure parameter      | -10.0(10)                                                                                               | -0.025(13)                                                                                  |
| Extinction coefficient            | n/a                                                                                                     | n/a                                                                                         |
| Largest diff. peak and hole       | 0.544 and -0.661 e.Å <sup>-3</sup>                                                                      | 0.315 and -0.451 e.Å <sup>-3</sup>                                                          |

**Table S2.** Selected bond distances and angles of X-ray structure of **L1** and **CuL2**.

| <b>L1</b>       |            |              |            | <b>CuL2</b>     |            |              |            |
|-----------------|------------|--------------|------------|-----------------|------------|--------------|------------|
| <b>Distance</b> | <b>(Å)</b> | <b>Angle</b> | <b>(°)</b> | <b>Distance</b> | <b>(Å)</b> | <b>Angle</b> | <b>(°)</b> |
| C2-N1           | 1.47(2)    | N4-C7-C6     | 109.5(15)  | Cu – N2         | 1.925(3)   | N2 – Cu – N3 | 97.56(14)  |
| C7-N4           | 1.490(2)   | N3-C4-C5     | 110.2(13)  | Cu – N3         | 1.912(3)   | N3 – Cu – N4 | 83.13(14)  |
| C4-N2           | 1.50(2)    | N1-C2-C3     | 117.1(15)  | Cu – N1         | 2.037(3)   | N2 – Cu – N4 | 168.15(13) |
| C5-N3           | 1.46(2)    |              |            | Cu – N4         | 2.049(4)   | N1 – Cu – N3 | 167.89(14) |
| C6-C3           | 1.33(0)    |              |            | N1-C2           | 1.485(5)   | N1 – Cu – N2 | 82.88(13)  |
| C3-N2           | 1.34(2)    |              |            | N2-C3           | 1.319(6)   | N1 – Cu – N4 | 98.94(13)  |
| C6-O2           | 1.30(2)    |              |            | N3-C7           | 1.327(5)   |              |            |
| C2-O1           | 1.29(8)    |              |            | N4-C8           | 1.486(5)   |              |            |

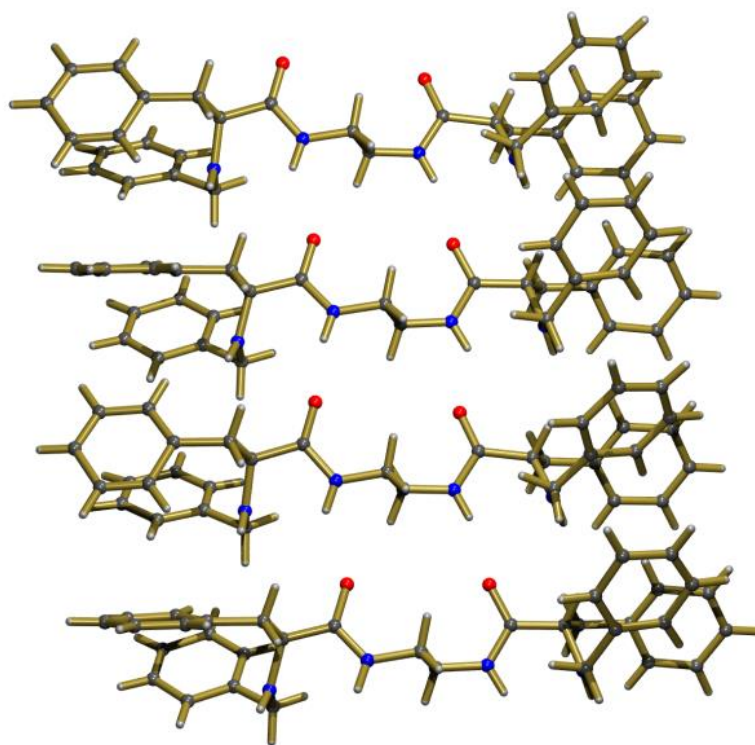

**Figure S23.** Parallel disposition of the molecules of **L1** in the crystal structure.

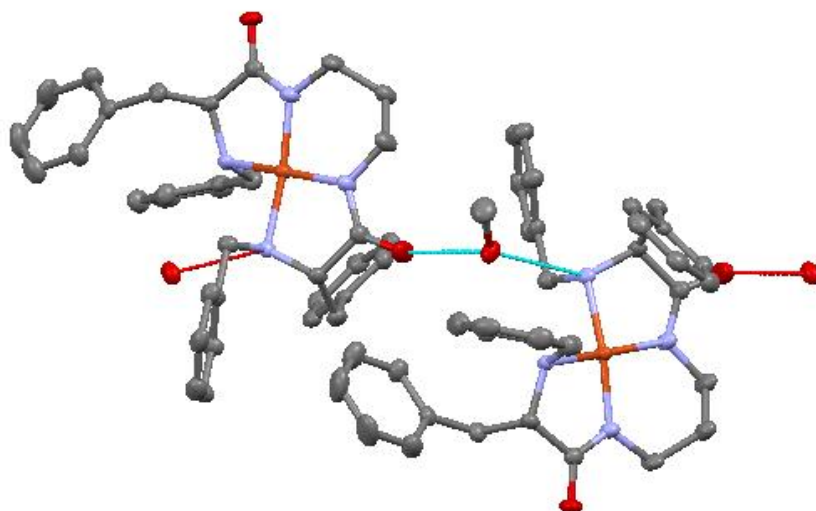

**Figure S24.** Hydrogen bonds established between the methanol crystallized molecule and two molecules of CuL2.

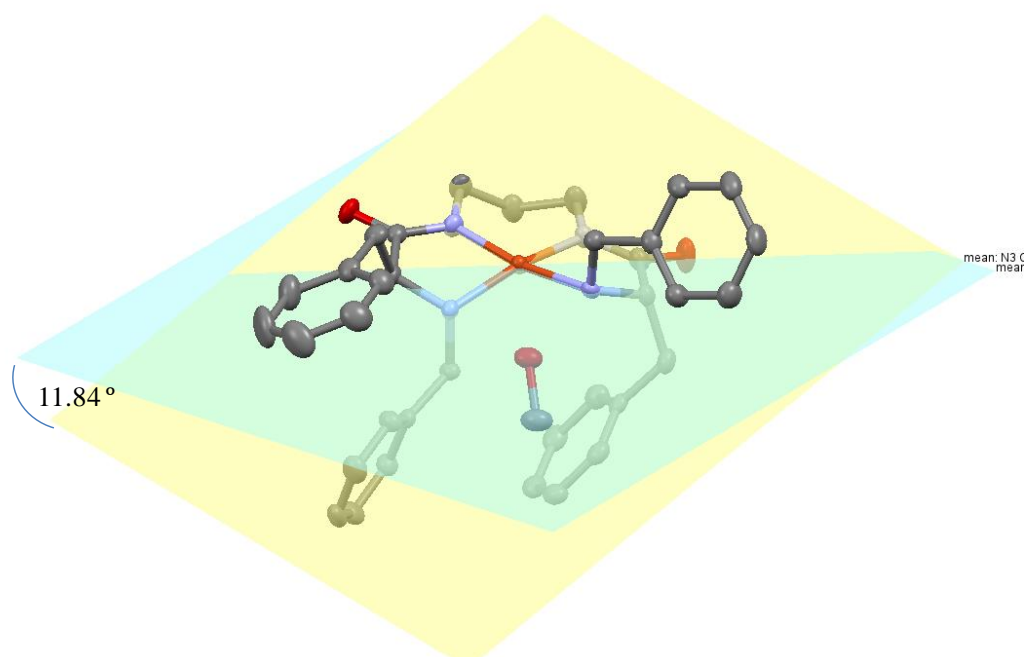

**Figure S25.** Torsion angle displayed by the Cu-complex coordination.

## 5. EPR spectra

**Table S3.** Best fit EPR spectroscopic parameters of Cu complexes in solid solution (MeOH, 103 K)

|                          | $A_{\parallel}$ | $A_{\perp}$ | $A_N$ | $g_{\parallel}$ | $g_{\perp}$ | $g_{\parallel}/A_{\parallel}$ | type                            |
|--------------------------|-----------------|-------------|-------|-----------------|-------------|-------------------------------|---------------------------------|
| <b>CuAsp<sub>2</sub></b> | 167.5           | 17.6        | 11.3  | 2.26112         | 2.04634     | 127.9                         | CuN <sub>2</sub> O <sub>2</sub> |
| <b>CuMal<sub>2</sub></b> | 122.2           | 13.4        | ---   | 2.38329         | 2.07146     | 175.2                         | CuO <sub>4</sub>                |

|                         | $A_{\parallel}$ | $A_{\perp}$ | $A_N$ | $g_{\parallel}$ | $g_{\perp}$ | $g_{\parallel}/A_{\parallel}$ | type             |
|-------------------------|-----------------|-------------|-------|-----------------|-------------|-------------------------------|------------------|
| <b>CuL1</b>             | 199.5           | 23.6        | 14.7  | 2.18220         | 2.04135     | 107.4                         | CuN <sub>4</sub> |
| <b>CuL2</b>             | 200.8           | 21.0        | 15.67 | 2.18521         | 2.04139     | 108.8                         | CuN <sub>4</sub> |
| <b>Cu<sub>2</sub>L3</b> | 190.4           | 23.2        | 14.8  | 2.18843         | 2.04365     | 112.5                         | CuN <sub>4</sub> |
| <b>Cu<sub>2</sub>L4</b> | 197.5           | 24.8        | 14.7  | 2.18465         | 2.04048     | 108.5                         | CuN <sub>4</sub> |

### CuL1 plus different anions

|                   | $A_{\parallel}$ | $A_{\perp}$ | $A_N$ | $g_{\parallel}$ | $g_{\perp}$ | $g_{\parallel}/A_{\parallel}$ | type                            |
|-------------------|-----------------|-------------|-------|-----------------|-------------|-------------------------------|---------------------------------|
| <b>CuL1</b>       | 199.5           | 23.6        | 14.7  | 2.18220         | 2.04135     | 107.4                         | CuN <sub>4</sub>                |
| <b>CuL1 + Asp</b> | 167.6           | 18.9        | 12.4  | 2.26265         | 2.04751     | 127.8                         | CuN <sub>2</sub> O <sub>2</sub> |
| <b>CuL1 + Mal</b> | 168.6           | 24.8        | 12.8  | 2.23767         | 2.04773     | 127.0                         | CuN <sub>2</sub> O <sub>2</sub> |
| minor component   | 169.4           | 18.2        | 12.8  | 2.18311         | 2.04082     | 126.4                         | CuN <sub>2</sub> O <sub>2</sub> |

### Cu<sub>2</sub>L3 plus different anions

|                               |       |      |      |         |         |       |                                 |
|-------------------------------|-------|------|------|---------|---------|-------|---------------------------------|
| <b>Cu<sub>2</sub>L3</b>       | 190.4 | 23.2 | 14.8 | 2.18843 | 2.04365 | 112.5 | CuN <sub>4</sub>                |
| <b>Cu<sub>2</sub>L3 + Suc</b> | 191.4 | 23.2 | 14.8 | 2.18625 | 2.04858 | 111.9 | CuN <sub>4</sub>                |
| <b>Cu<sub>2</sub>L3 + Mal</b> | 162.8 | 25.6 | 14.8 | 2.24220 | 2.04873 | 131.6 | CuN <sub>2</sub> O <sub>2</sub> |
| <b>Cu<sub>2</sub>L3 + Asp</b> | 168.2 | 17.6 | 12.3 | 2.26092 | 2.04923 | 127.4 | CuN <sub>2</sub> O <sub>2</sub> |

### Cu<sub>2</sub>L4 plus different anions

|                               |       |      |      |         |         |       |                                 |
|-------------------------------|-------|------|------|---------|---------|-------|---------------------------------|
| <b>Cu<sub>2</sub>L4</b>       | 197.5 | 24.8 | 14.7 | 2.18465 | 2.04048 | 108.5 | CuN <sub>4</sub>                |
| <b>Cu<sub>2</sub>L4 + Mal</b> | 162.8 | 25.6 | 14.8 | 2.24220 | 2.04673 | 131.6 | CuN <sub>2</sub> O <sub>2</sub> |
| <b>Cu<sub>2</sub>L4 + Asp</b> | 169.2 | 18.2 | 11.7 | 2.25840 | 2.04729 | 126.6 | CuN <sub>2</sub> O <sub>2</sub> |



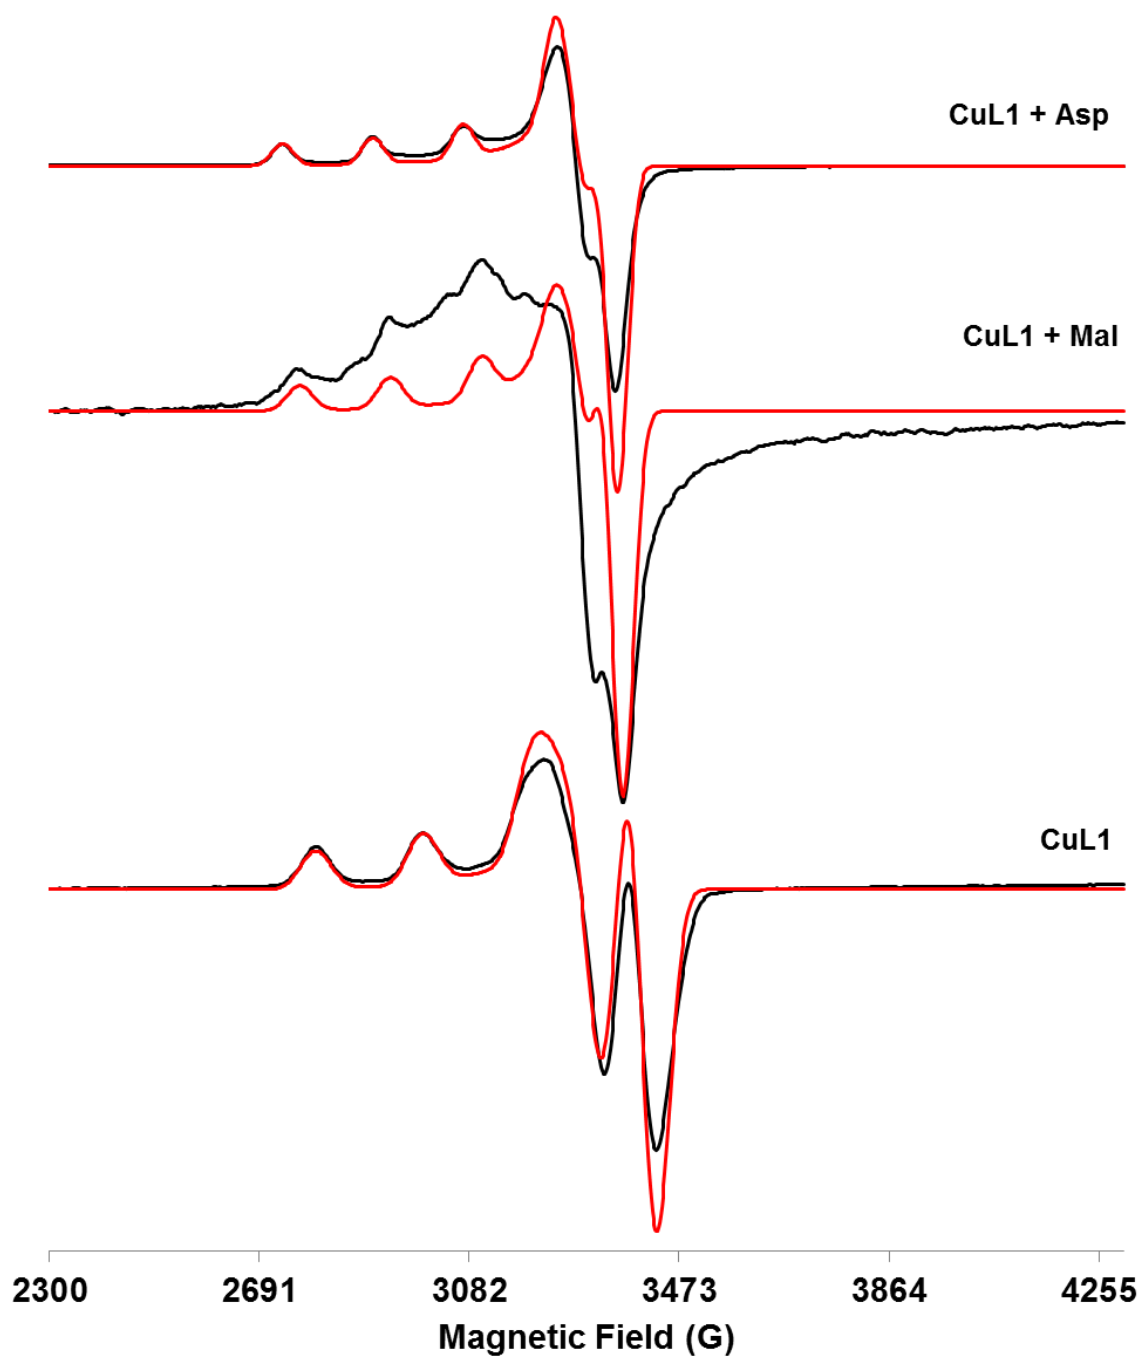

**Figure S26.** X-band EPR spectra of a frozen methanol solution (103 K) of CuL1 alone and in the presence of different dicarboxylate anions (black: experimental; red: simulated).

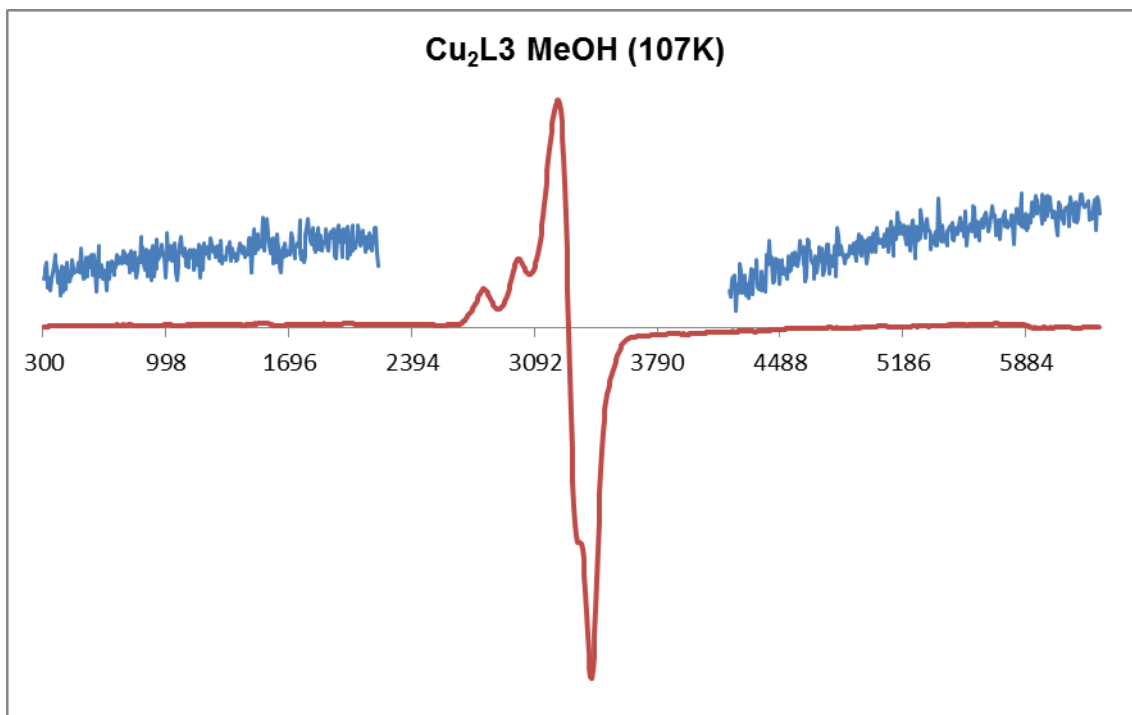

**Fig. S27.** In red: X-band EPR spectra of a frozen methanol solution (107 K) of  $\text{Cu}_2\text{L3}$  complex (field scan range from 300 to 6300 G). In blue: 10x magnification of selected regions of the spectrum.

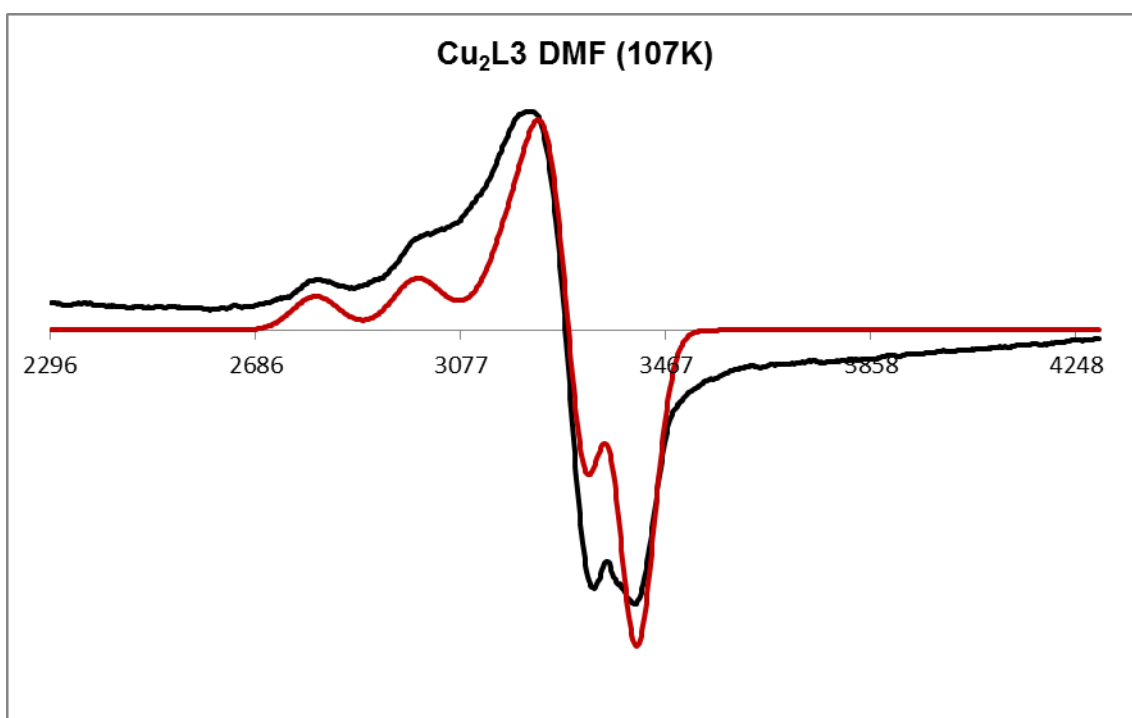

**Fig. S28.** X-band EPR spectrum of a frozen DMF solution (107 K) of  $\text{Cu}_2\text{L3}$  complex (black: experimental; red: simulated). Spectral parameters: ( $A_{\parallel} = 194.3$  G;  $A_{\perp} = 22.6$  G;  $A_N = 14.8$  G;  $g_{\parallel} = 2.18395$ ;  $g_{\perp} = 2.04397$ ).

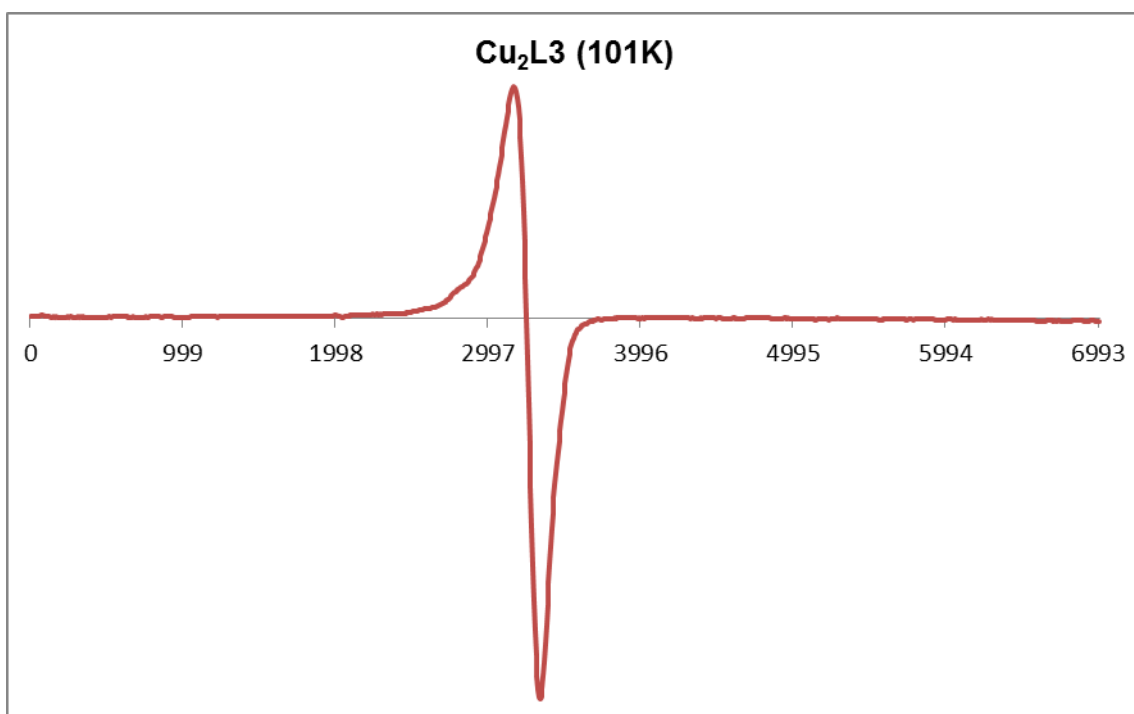

**Fig. S29.** X-band EPR spectrum (101 K) of  $\text{Cu}_2\text{L3}$  complex in solid state (field scan range from 0 to 7000 G).

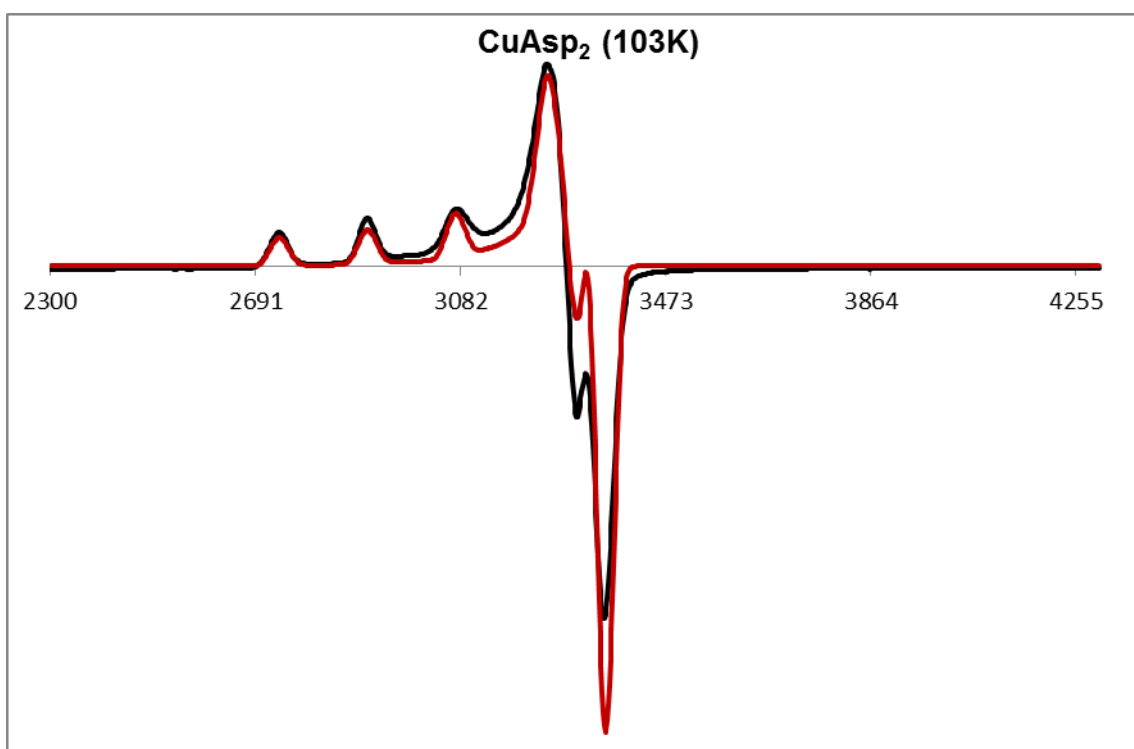

**Fig. S30.** X-band EPR spectrum of a frozen methanol solution (103 K) of  $\text{CuAsp}_2$  (black: experimental; red: simulated).

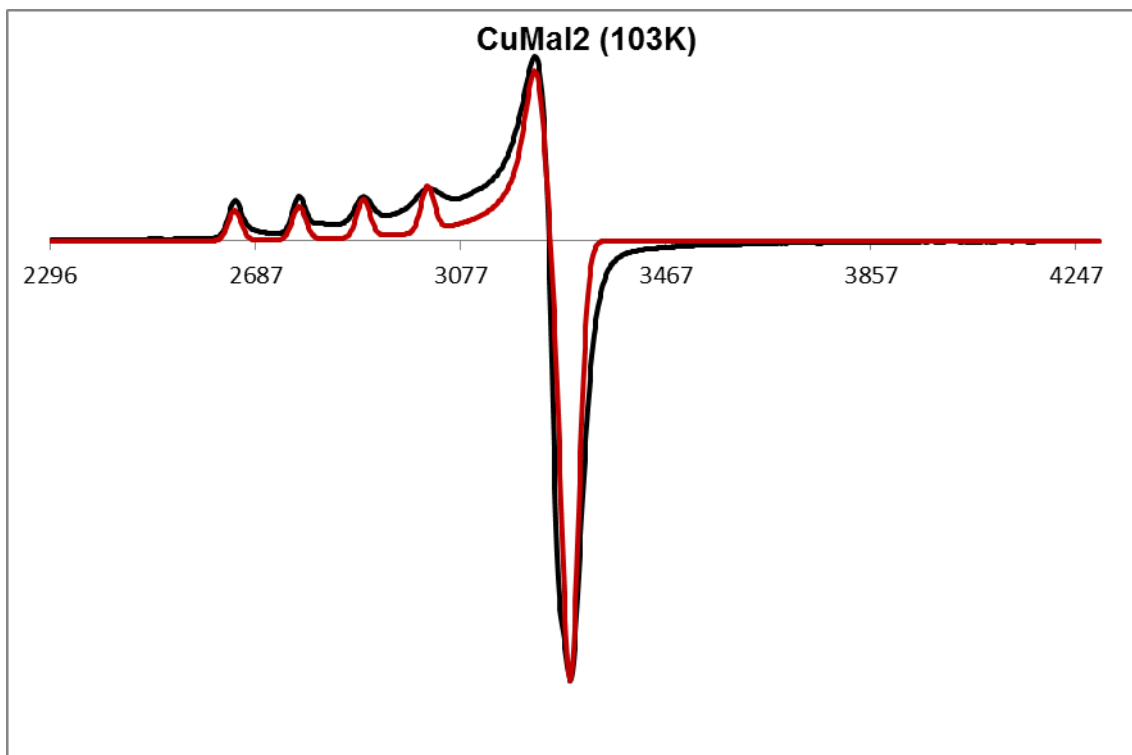

**Fig. S31.** X-band EPR spectrum of a frozen methanol solution (103 K) of CuMal<sub>2</sub>. (black: experimental; red: simulated).

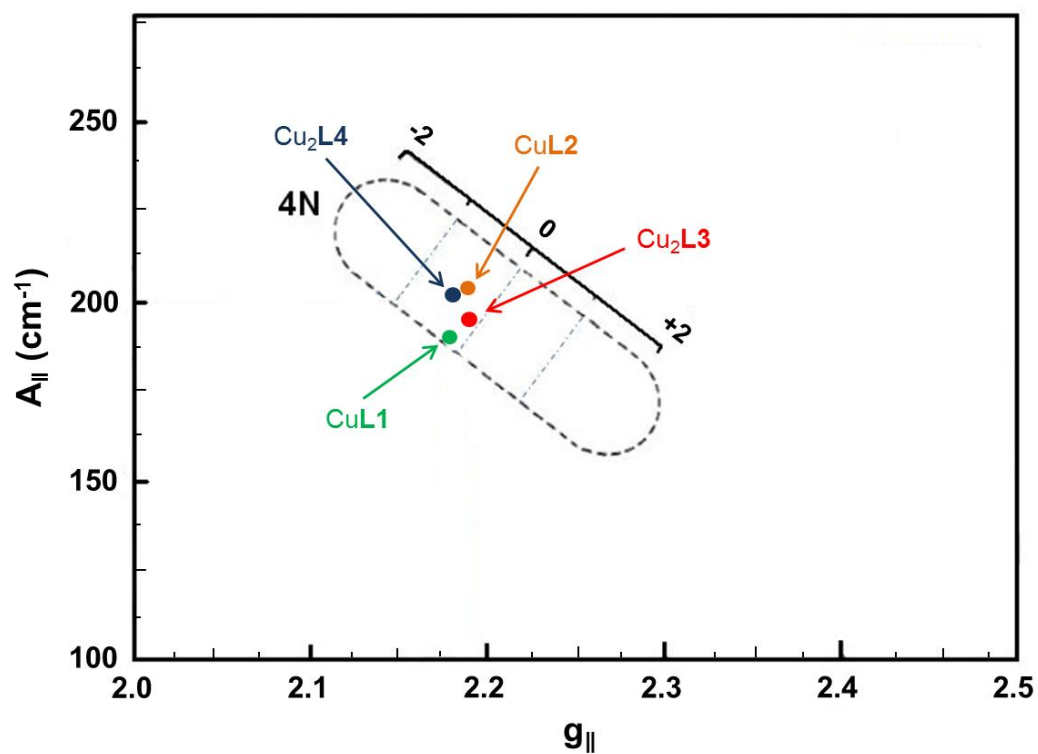

**Figure S32.** Peisach and Blumberg plot of CuL1, CuL2, Cu<sub>2</sub>L3 and Cu<sub>2</sub>L4.

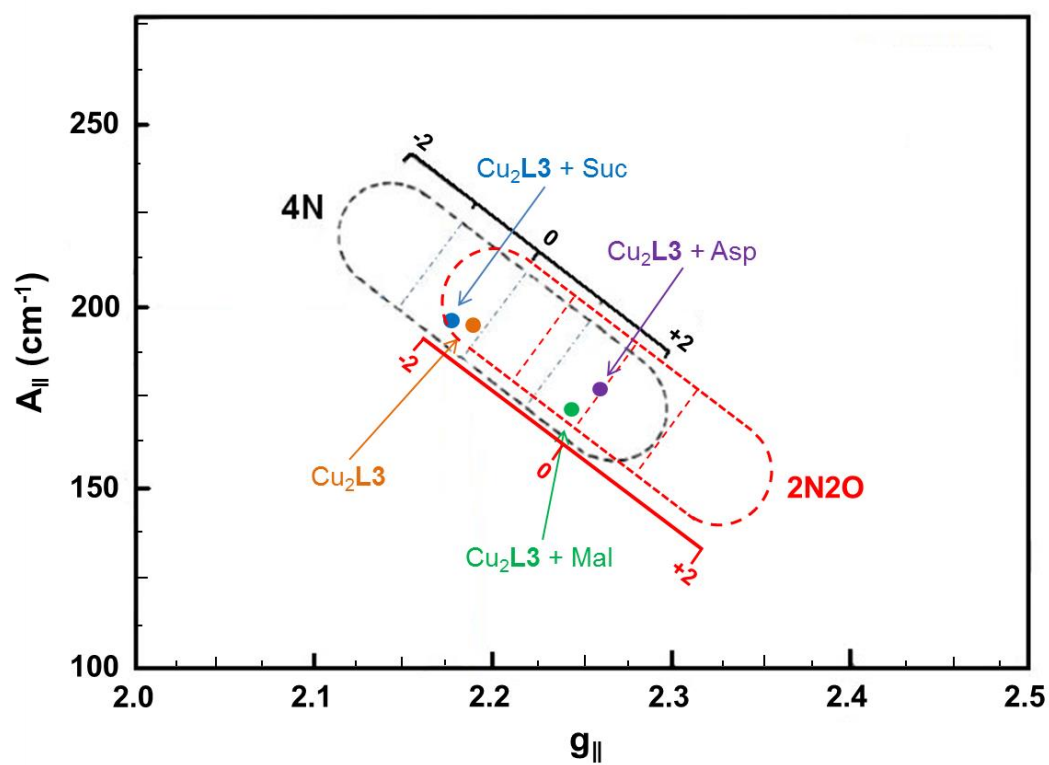

**Figure S33.** Peisach and Blumberg plot of  $\text{Cu}_2\text{L3}$ ,  $\text{Cu}_2\text{L3} + (\text{TBA})_2\text{-Succinate}$ ,  $\text{Cu}_2\text{L3} + (\text{TBA})_2\text{-Malate}$  and  $\text{Cu}_2\text{L3} + (\text{TBA})_2\text{-Aspartate}$ .

## 6. UV-vis titrations

$\text{Cu}_2\text{L3}$  vs. dicarboxylates

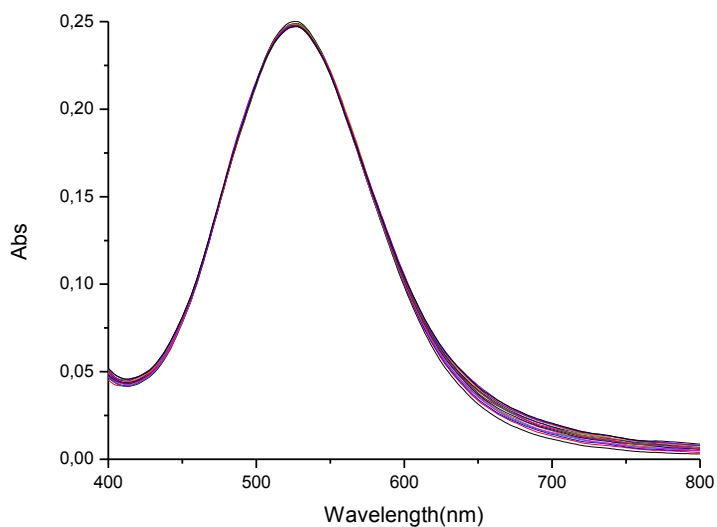

**Figure S34.** UV-vis spectra of  $\text{Cu}_2\text{L3}$  ( $7.0 \cdot 10^{-4}$  M, MeOH) in presence of increasing amounts of  $(\text{TBA})_2\text{-Succinate}$  ( $0\text{-}2.8 \cdot 10^{-3}$  M; 0-4 eqs.).

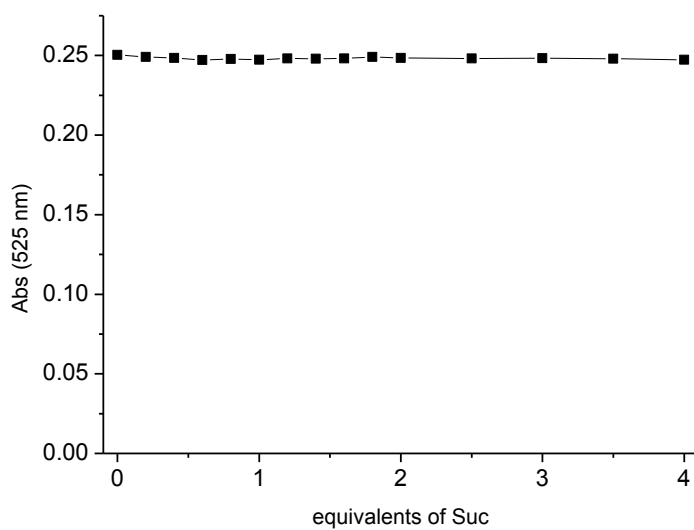

**Figure S35.** Changes in the absorbance at 525 nm of  $\text{Cu}_2\text{L3}$  upon addition of  $(\text{TBA})_2\text{-Succinate}$ .

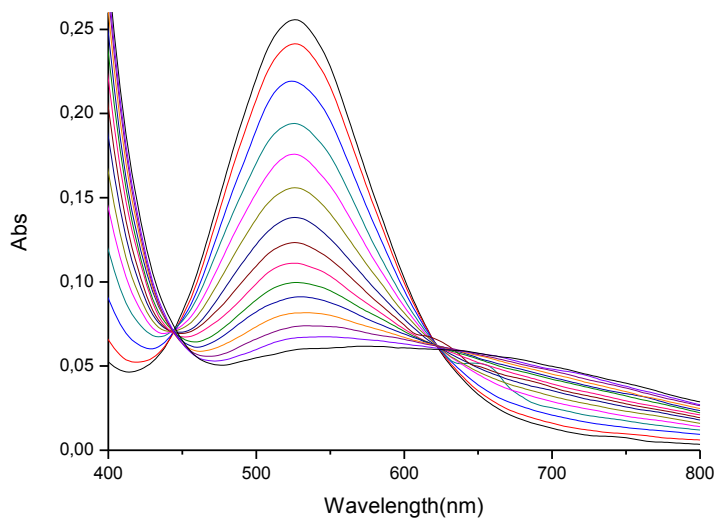

**Figure S36.** UV-vis spectra of  $\text{Cu}_2\text{L3}$  ( $7.0 \cdot 10^{-4}$  M, MeOH) in presence of increasing amounts of  $(\text{TBA})_2\text{-L-malate}$  ( $0-2.8 \cdot 10^{-3}$  M; 0-4 eqs.).

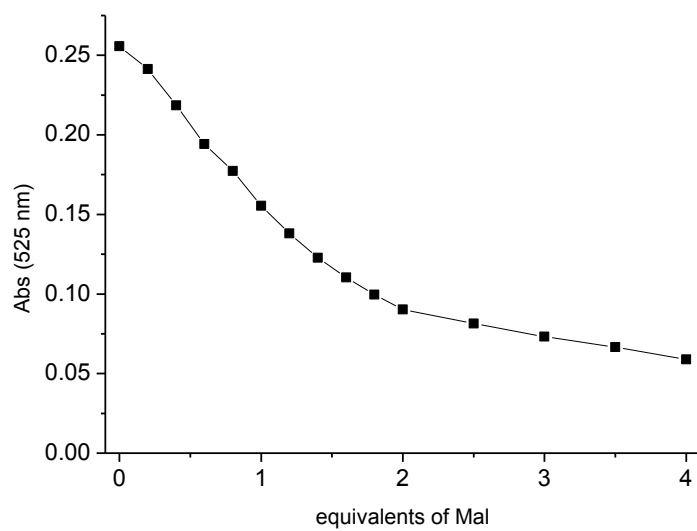

**Figure S37.** Changes in the absorbance at 525 nm of  $\text{Cu}_2\text{L3}$  upon addition of  $(\text{TBA})_2\text{-Malate}$ .

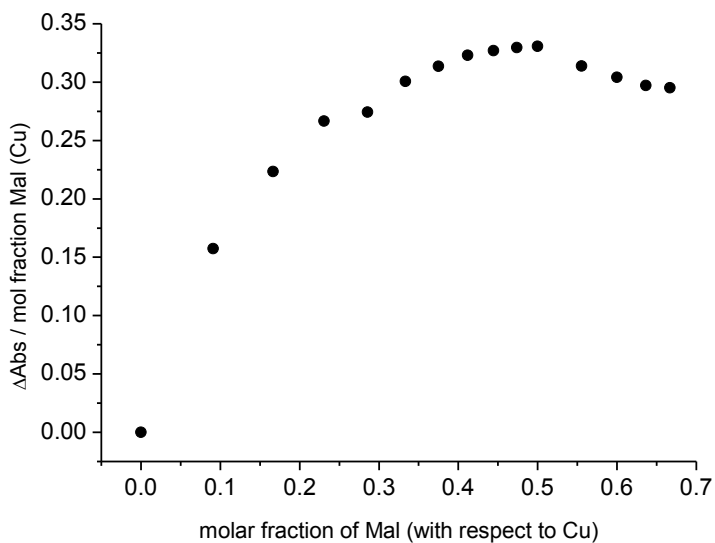

**Figure S38.** Job plot for the  $\text{Cu}_2\text{L3}$  -  $(\text{TBA})_2\text{-Malate}$  system.

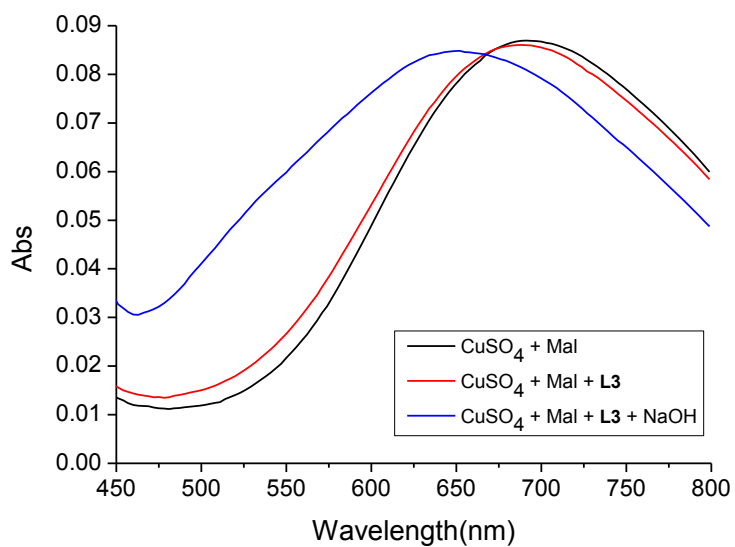

**Figure S39.** UV-vis spectra comparison (MeOH). Black:  $\text{CuSO}_4$  [ $2 \cdot 10^{-3}$  M] + 2.0 eqs. of  $(\text{TBA})_2\text{-Malate}$ ; Red: after the addition of 0.5 eqs. of **L3**; Blue: after the further addition of 2.0 eqs. of NaOH.



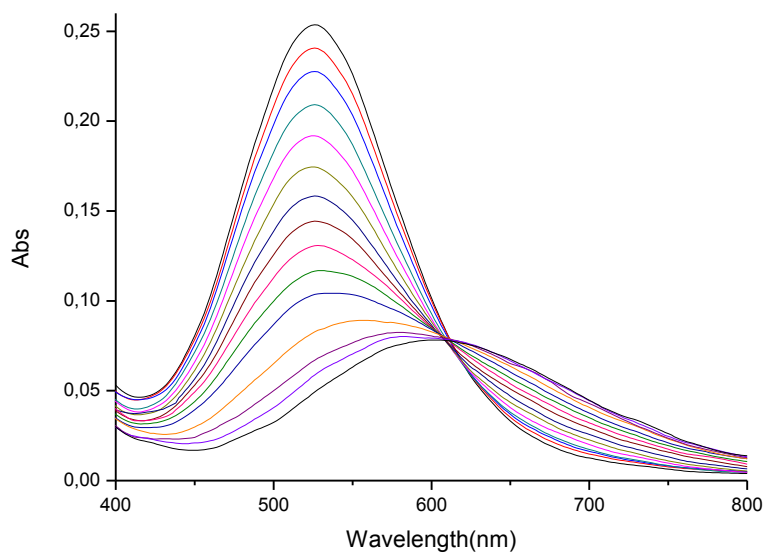

**Figure S40.** UV-vis spectra of  $\text{Cu}_2\text{L3}$  ( $7.0 \cdot 10^{-4}$  M, MeOH) in presence of increasing amounts of  $(\text{TBA})_2\text{-L-glutamate}$  ( $0\text{-}2.8 \cdot 10^{-3}$  M;  $0\text{-}4$  eqs.).

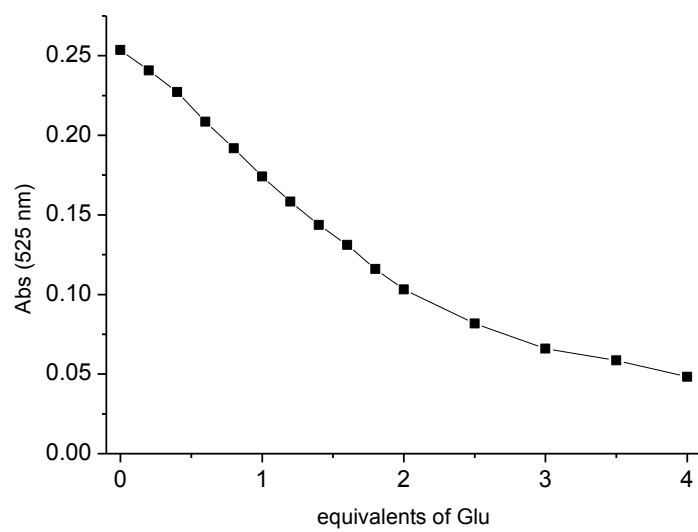

**Figure S41.** Changes in the absorbance at 525 nm of  $\text{Cu}_2\text{L3}$  upon addition of  $(\text{TBA})_2\text{-Glutamate}$ .

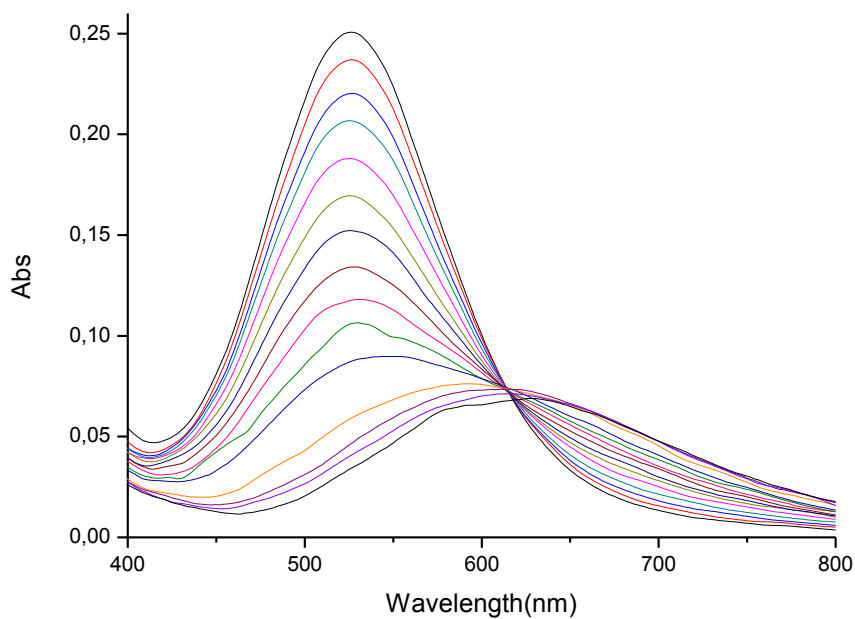

**Figure S42.** UV-vis spectra of  $\text{Cu}_2\text{L3}$  ( $7.0 \cdot 10^{-4}$  M, MeOH) in presence of increasing amounts of  $(\text{TBA})_2\text{-L-aspartate}$  ( $0\text{-}2.8 \cdot 10^{-3}$  M;  $0\text{-}4$  eqs.).

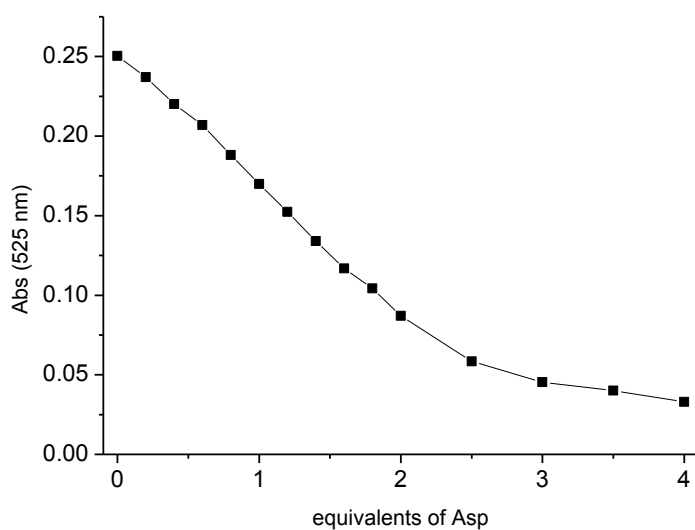

**Figure S43.** Changes in the absorbance at 525 nm of  $\text{Cu}_2\text{L3}$  upon addition of  $(\text{TBA})_2\text{-Aspartate}$ .

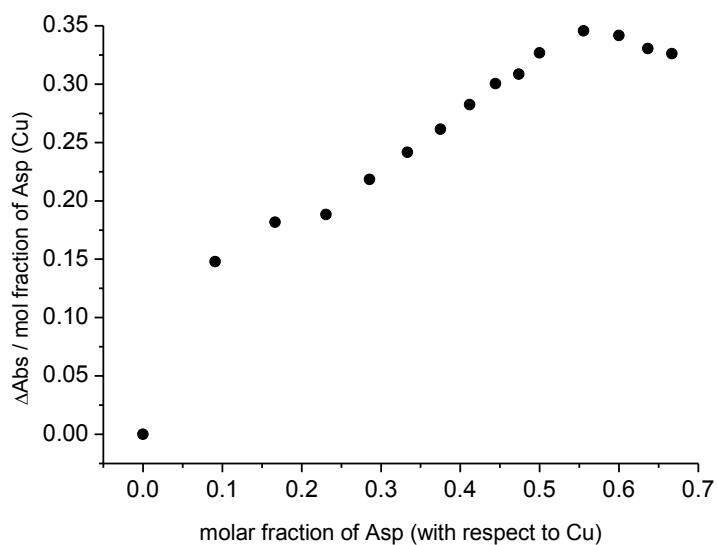

**Figure S44.** Job plot for the  $\text{Cu}_2\text{L3} - (\text{TBA})_2\text{-Aspartate}$  system.

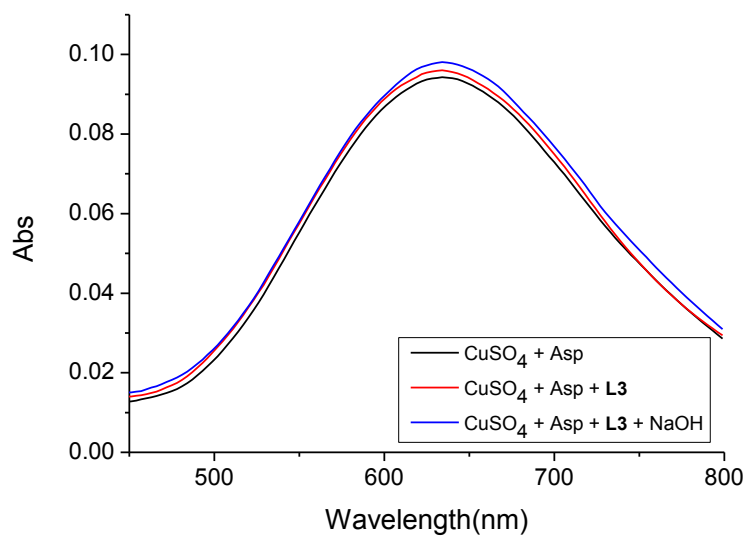

**Figure S45.** UV-vis spectra comparison (MeOH). Black:  $\text{CuSO}_4$  [ $2 \cdot 10^{-3}$  M] + 2.0 eqs. of  $(\text{TBA})_2\text{-Aspartate}$ ; Red: after the addition of 0.5 eqs. of **L3**; Blue: after the further addition of 2.0 eqs. of NaOH.

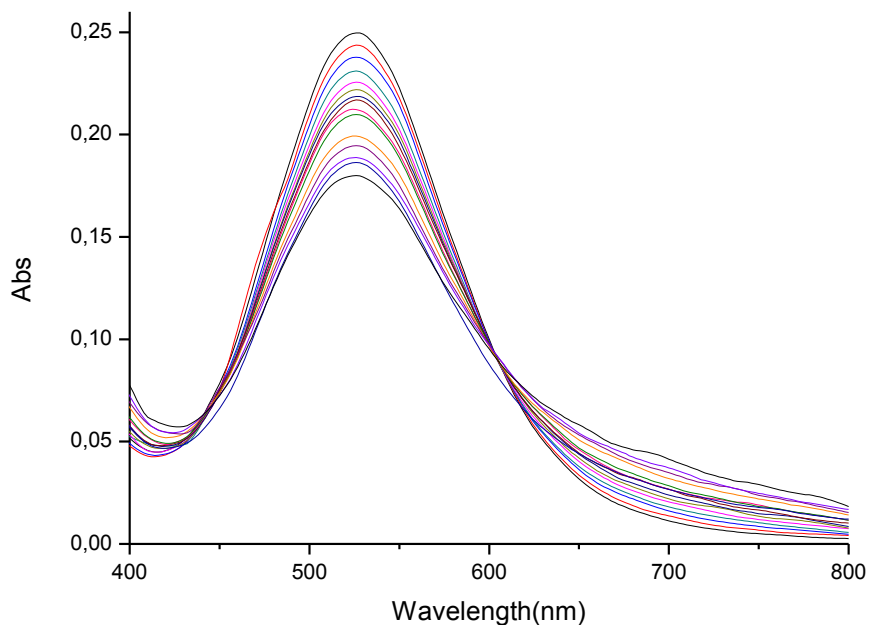

**Figure S46.** UV-vis spectra of  $\text{Cu}_2\text{L3}$  ( $7.0 \cdot 10^{-4}$  M, MeOH) in presence of increasing amounts of  $(\text{TBA})_2\text{-N-acetyl-L-aspartate}$  ( $0\text{-}2.8 \cdot 10^{-3}$  M;  $0\text{-}4$  eqs.).

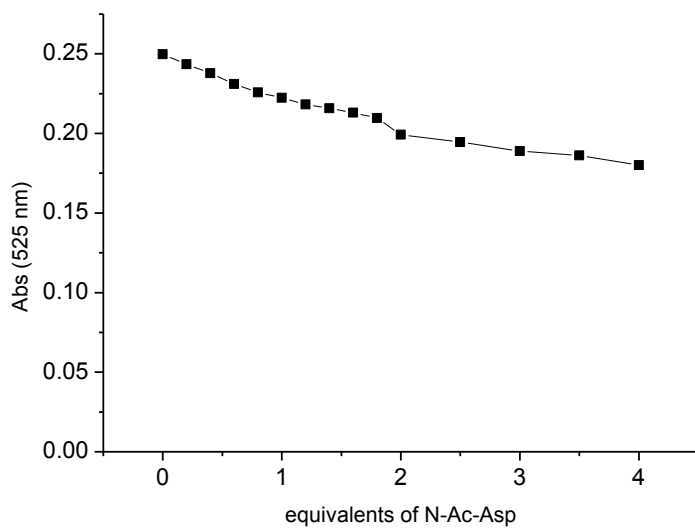

**Figure S47.** Changes in the absorbance at 525 nm of  $\text{Cu}_2\text{L3}$  upon addition of  $(\text{TBA})_2\text{-N-Ac-Aspartate}$ .

**Cu<sub>2</sub>L4** vs. dicarboxylates

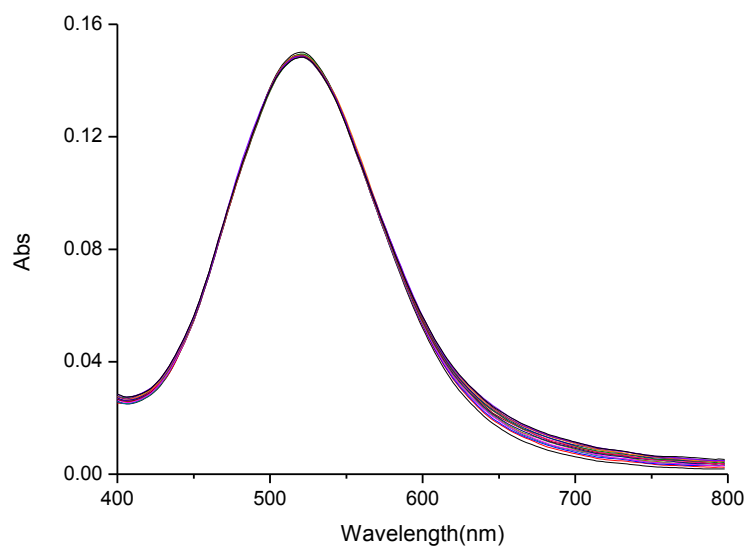

**Figure S48.** UV-vis spectra of Cu<sub>2</sub>L4 ( $5.0 \cdot 10^{-4}$  M, MeOH) in presence of increasing amounts of (TBA)<sub>2</sub>-Succinate ( $0-2.0 \cdot 10^{-3}$  M; 0-3 eqs.).

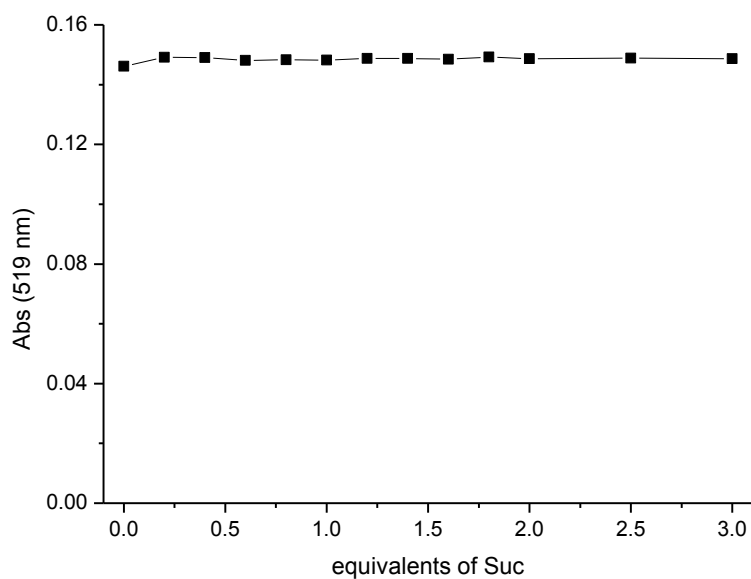

**Figure S49.** Changes in the absorbance at 519 nm of Cu<sub>2</sub>L4 upon addition of (TBA)<sub>2</sub>-Succinate.

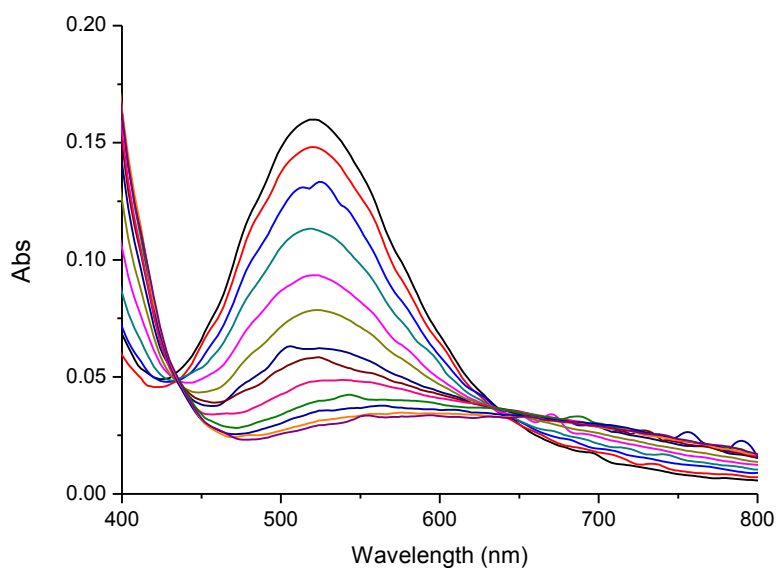

**Figure S50.** UV-vis spectra of  $\text{Cu}_2\text{L4}$  ( $5.0 \cdot 10^{-4}$  M, MeOH) in presence of increasing amounts of  $(\text{TBA})_2\text{-Malate}$  ( $0-2.0 \cdot 10^{-3}$  M; 0-4 eqs.).

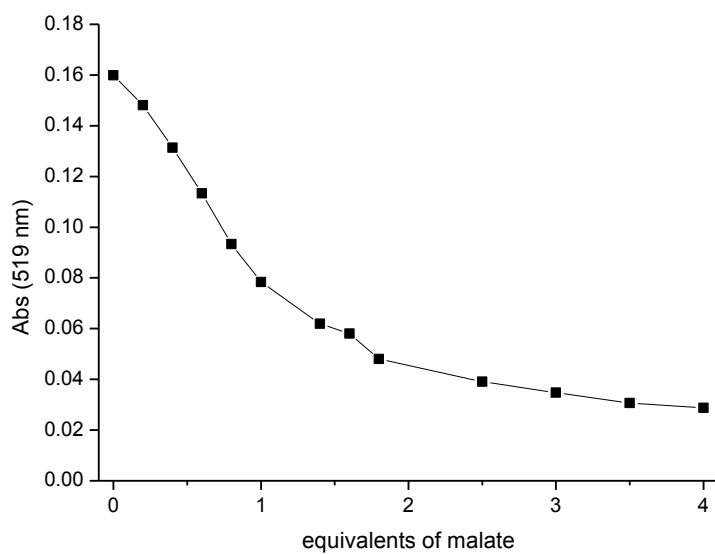

**Figure S51.** Changes in the absorbance at 519 nm of  $\text{Cu}_2\text{L4}$  upon addition of  $(\text{TBA})_2\text{-Malate}$ .

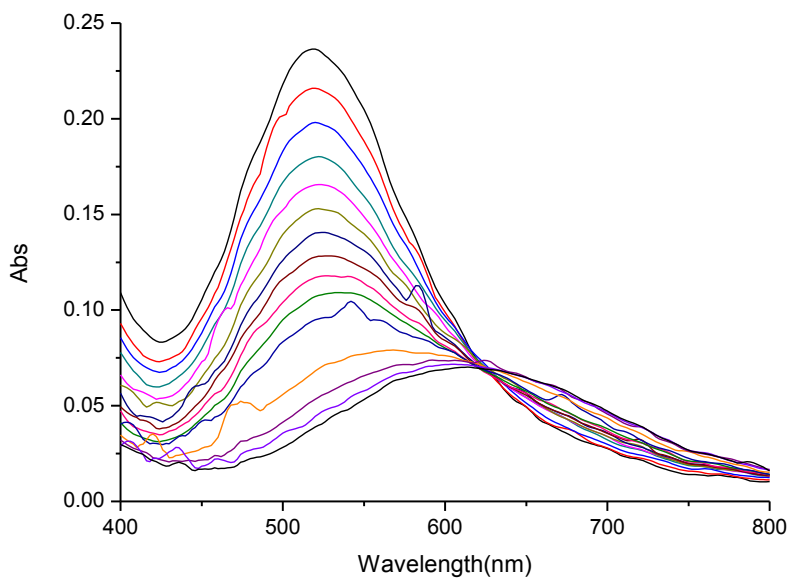

**Figure S52.** UV-vis spectra of  $\text{Cu}_2\text{L4}$  ( $7.5.0 \cdot 10^{-4}$  M, MeOH) in presence of increasing amounts of  $(\text{TBA})_2\text{-Aspartate}$  ( $0-3.0 \cdot 10^{-3}$  M; 0-4 eqs.).

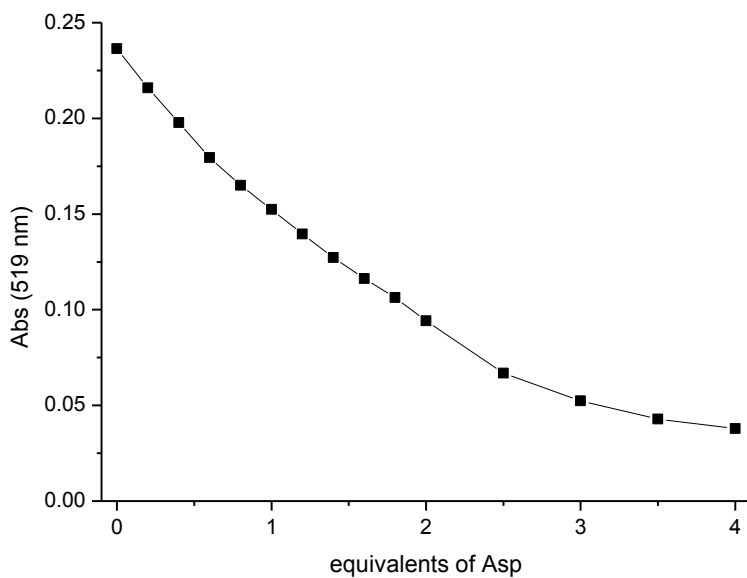

**Figure S53.** Changes in the absorbance at 519 nm of  $\text{Cu}_2\text{L4}$  upon addition of  $(\text{TBA})_2\text{-Aspartate}$ .

CuL1 vs. dicarboxylates

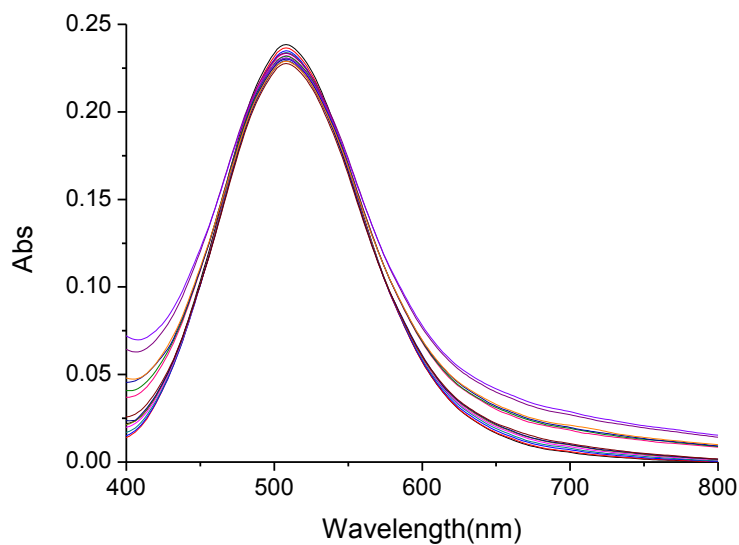

**Figure S54.** UV-vis spectra of CuL1 ( $1.0 \cdot 10^{-3}$  M, MeOH) in presence of increasing amounts of  $(\text{TBA})_2\text{-Succinate}$  ( $0\text{-}3.0 \cdot 10^{-3}$  M; 0-3 eqs.).

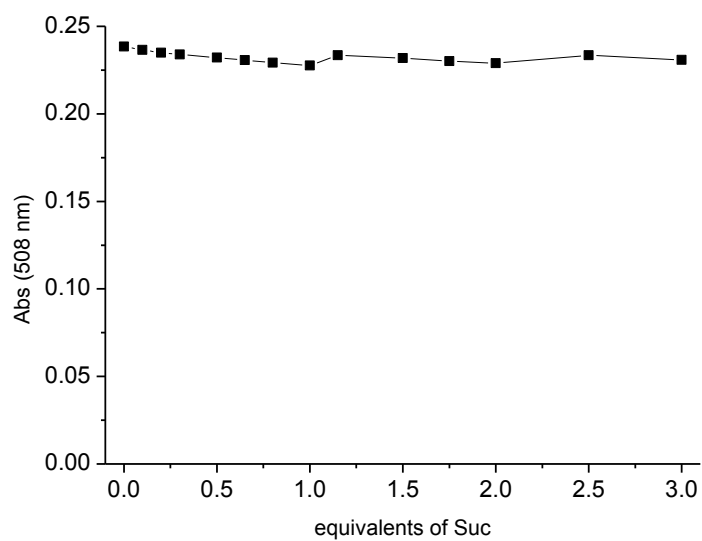

**Figure S55.** Changes in the absorbance at 508 nm of CuL1 upon addition of  $(\text{TBA})_2\text{-Succinate}$ .



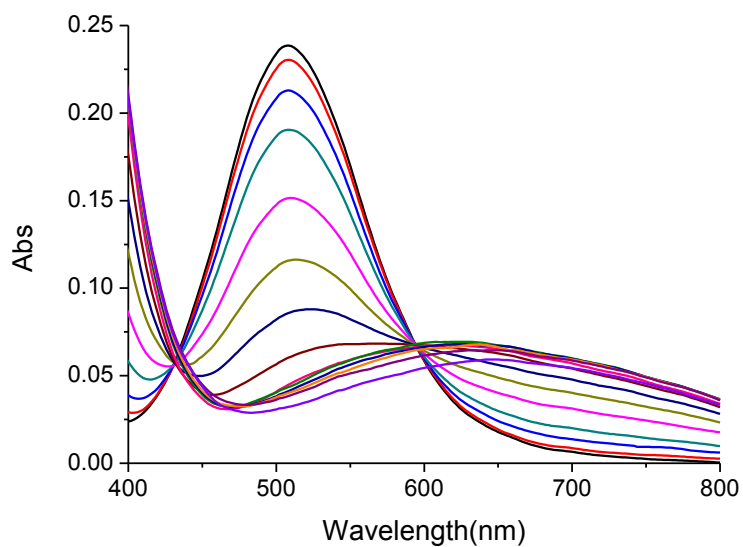

**Figure S56.** UV-vis spectra of CuL1 ( $1.0 \cdot 10^{-3}$  M, MeOH) in presence of increasing amounts of  $(\text{TBA})_2\text{-Malate}$  ( $0\text{-}3.0 \cdot 10^{-3}$  M; 0-3 eqs.).

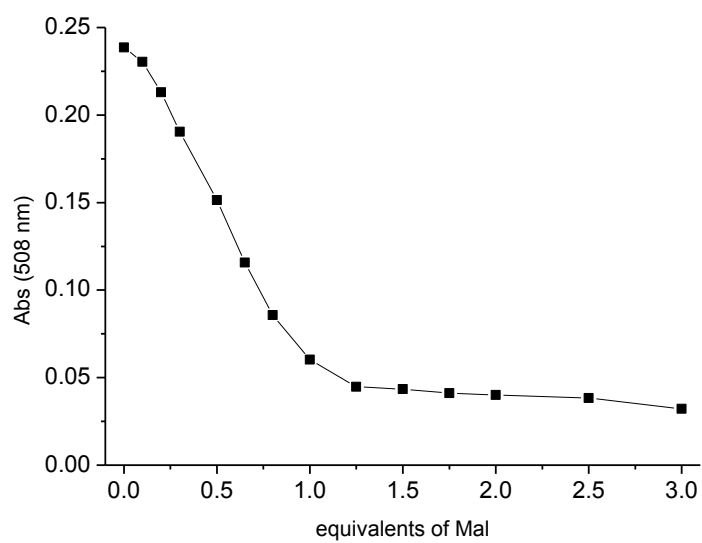

**Figure S57.** Changes in the absorbance at 508 nm of CuL1 upon addition of  $(\text{TBA})_2\text{-Malate}$ .

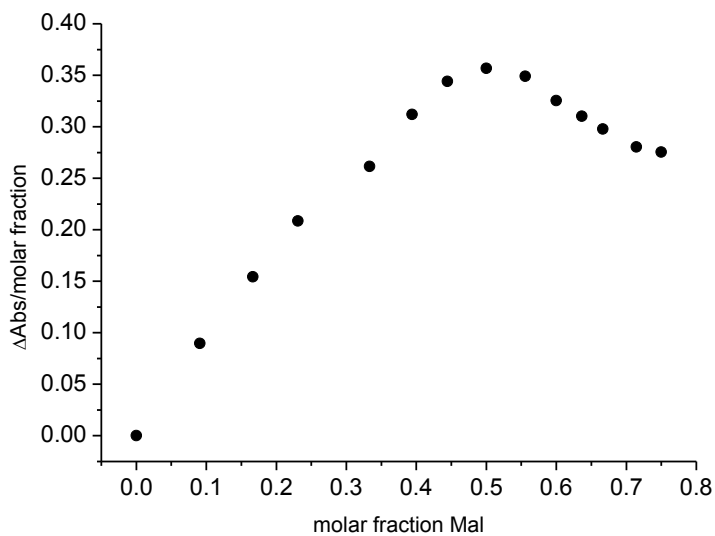

**Figure S58.** Job plot for the CuL1 - (TBA)<sub>2</sub>-Malate system.

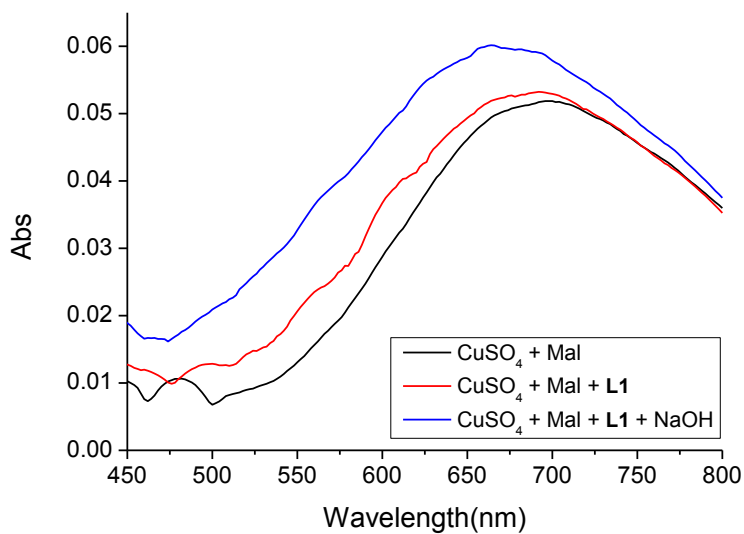

**Figure S59.** UV-vis spectra comparison (MeOH). Black: CuSO<sub>4</sub> [1·10<sup>-3</sup> M] + 2.0 eqs. of (TBA)<sub>2</sub>-Malate; Red: after the addition of 1.0 eq. of L1; Blue: after the further addition of 2.0 eqs. of NaOH.

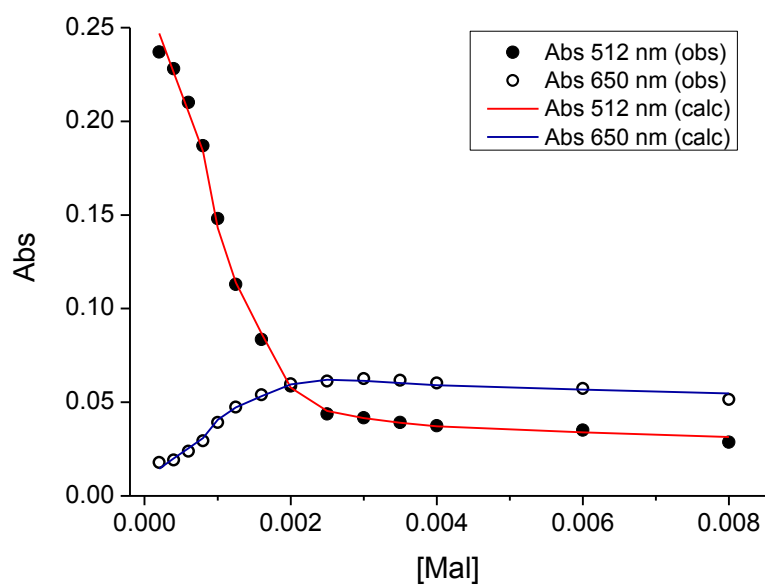

**Figure S60.** Absorbance values at 512 nm and 650 nm of CuL1 upon titration with (TBA)<sub>2</sub>-L-Malate (symbols: experimental data; lines: fitted data).

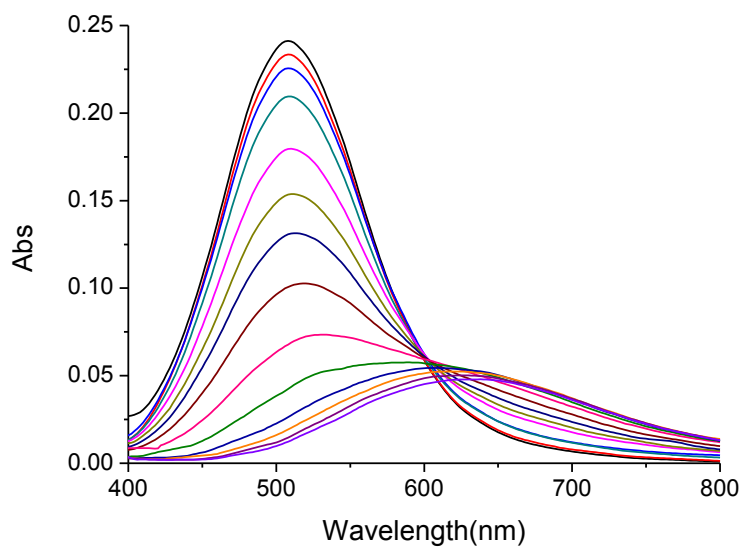

**Figure S61.** UV-vis spectra of CuL1 ( $1.0 \cdot 10^{-3}$  M, MeOH) in presence of increasing amounts of  $(\text{TBA})_2\text{-Aspartate}$  ( $0\text{-}3.0 \cdot 10^{-3}$  M; 0-3 eqs.).

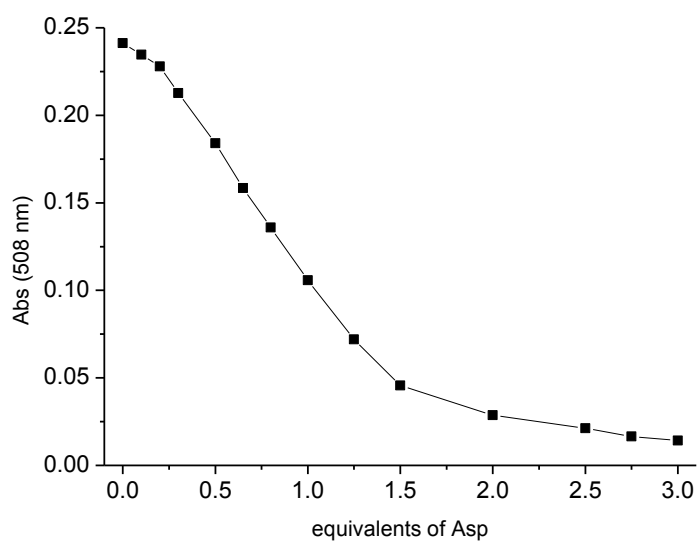

**Figure S62.** Changes in the absorbance at 508 nm of CuL1 upon addition of  $(\text{TBA})_2\text{-Aspartate}$ .

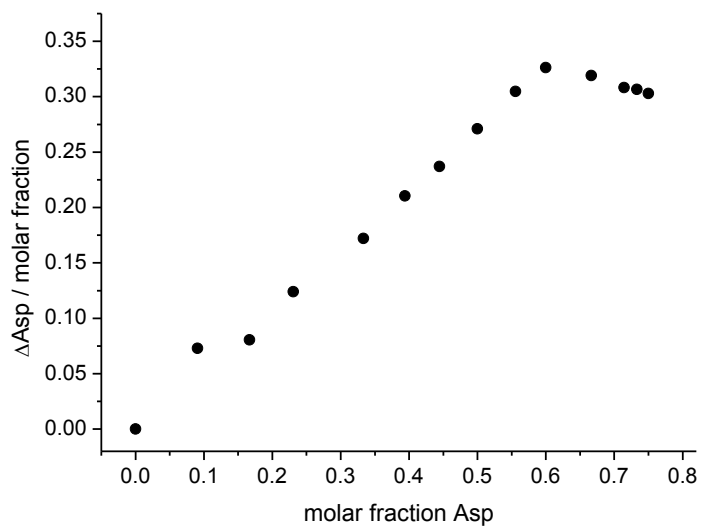

**Figure S63.** Job plot for the CuL1 - (TBA)<sub>2</sub>-Aspartate system.

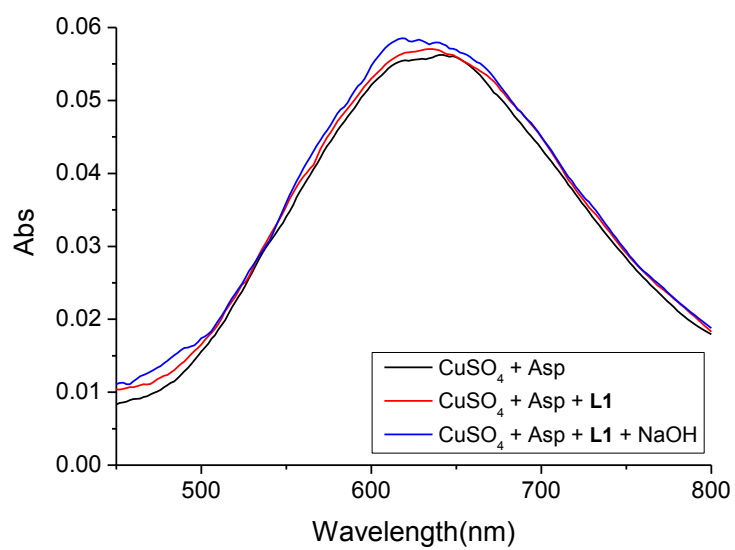

**Figure S64.** UV-vis spectra comparison (MeOH). Black: CuSO<sub>4</sub> [1·10<sup>-3</sup> M] + 2.0 eqs. of (TBA)<sub>2</sub>-Aspartate; Red: after the addition of 1.0 eq. of L1; Blue: after the further addition of 2.0 eqs. of NaOH.

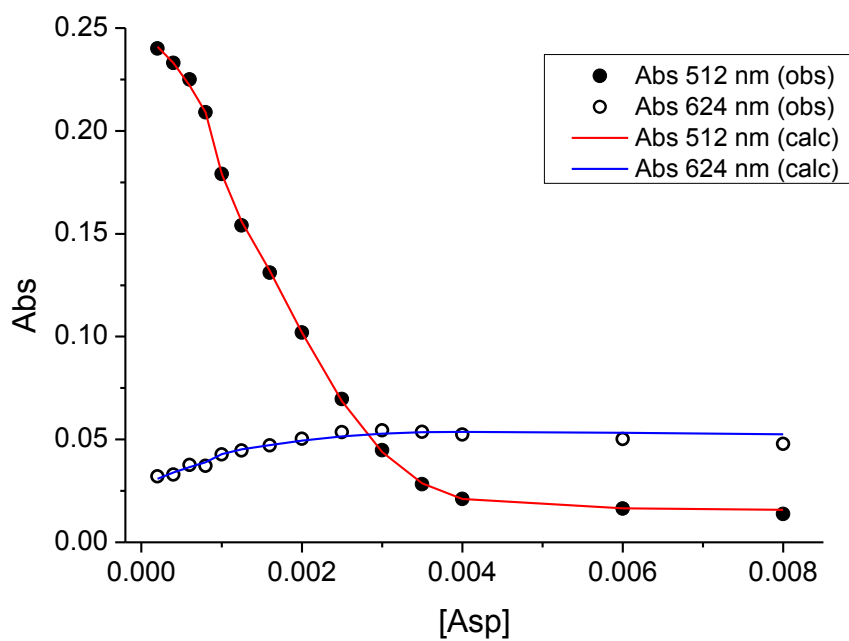

**Figure S65.** Absorbance values at 512 nm and 624 nm of CuL1 upon titration with (TBA)<sub>2</sub>-L-Aspartate (symbols: experimental data; lines: fitted data).

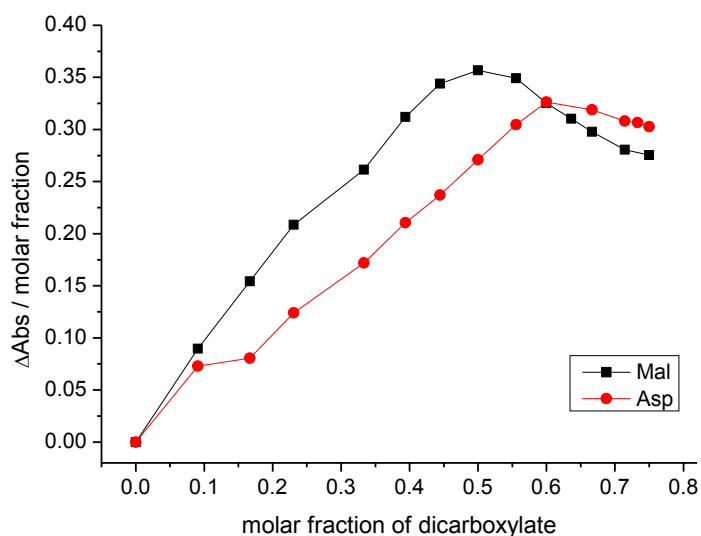

**Figure S66.** Job plots of the CuL1 - (TBA)<sub>2</sub>-Aspartate system (in red) and of the CuL1 - (TBA)<sub>2</sub>-Malate system (in black).

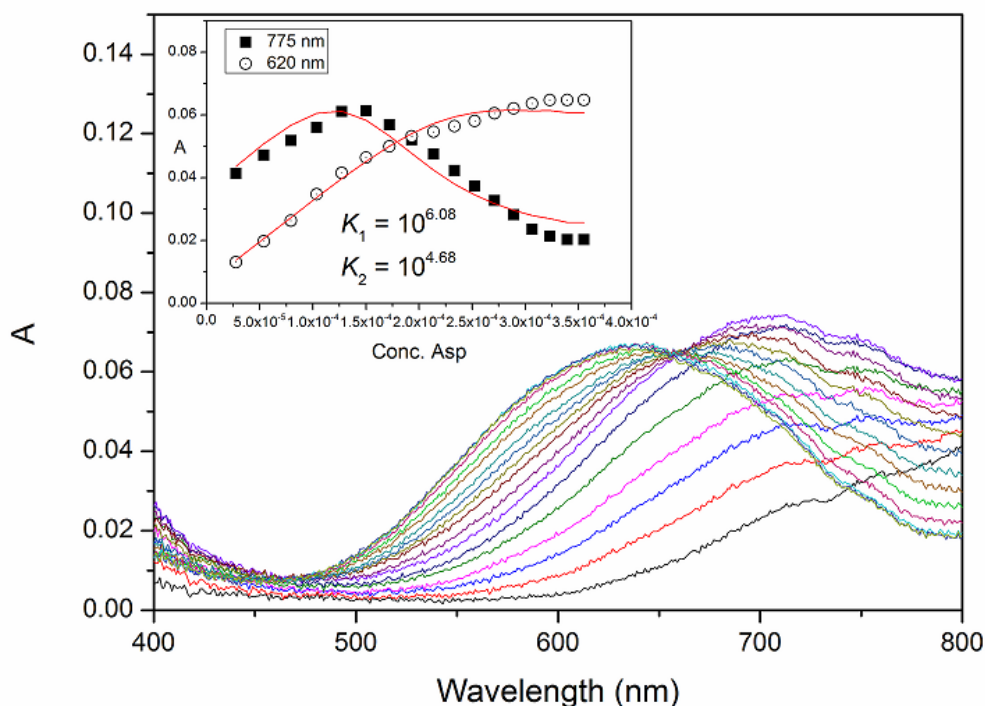

**Figure S67.** UV-vis spectral variations upon titration of  $1.4 \cdot 10^{-3}$  M  $\text{CuSO}_4$  with  $1.4 \cdot 10^{-2}$  M  $(\text{TBA})_2$ -L-Aspartate in MeOH. Inset: Absorption variations at 775 and 620 nm and fitting to the formation of the complexes  $\text{CuAsp}$  and  $\text{CuAsp}_2$  with association constants  $K_1 = 10^{6.08} \text{ M}^{-1}$  and  $K_2 = 10^{4.68} \text{ M}^{-1}$ , respectively.

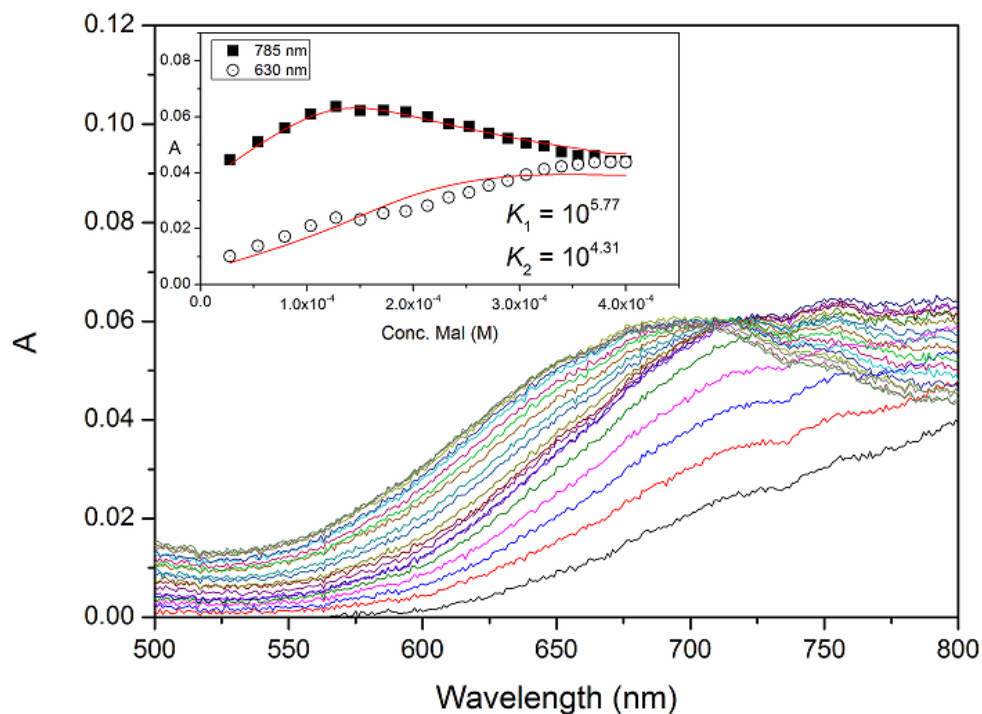

**Figure S68.** UV-vis spectral variations upon titration of  $1.4 \cdot 10^{-3}$  M  $\text{CuSO}_4$  with  $1.4 \cdot 10^{-2}$  M  $(\text{TBA})_2$ -L-Malate in MeOH. Inset: Absorption variations at 785 and 630 nm and fitting to the formation of the complexes  $\text{CuMal}$  and  $\text{CuMal}_2$  with association constants  $K_1 = 10^{5.77} \text{ M}^{-1}$  and  $K_2 = 10^{4.31} \text{ M}^{-1}$ , respectively.

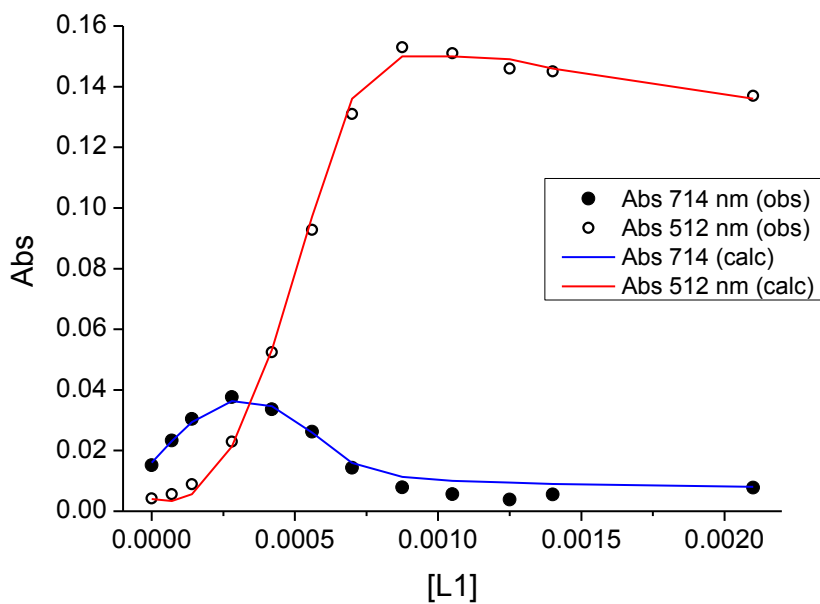

**Figure S69.** Absorbance values at 512 nm and 714 nm of CuSO<sub>4</sub> upon titration with **L1** in presence of stoichiometric amount of TBAOH (symbols: experimental data; lines: fitted data).

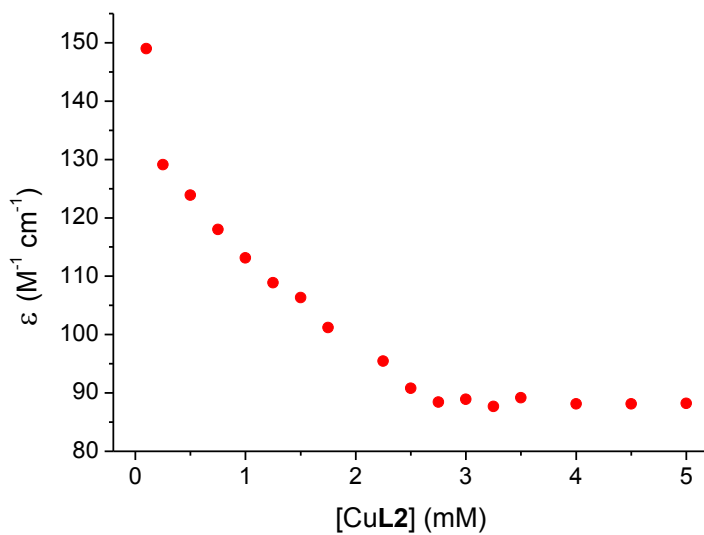

**Figure S70.** Dilution study of CuL2 in MeOH.



## 7. NMR spectra (Cu(II) complexes and dicarboxylates)

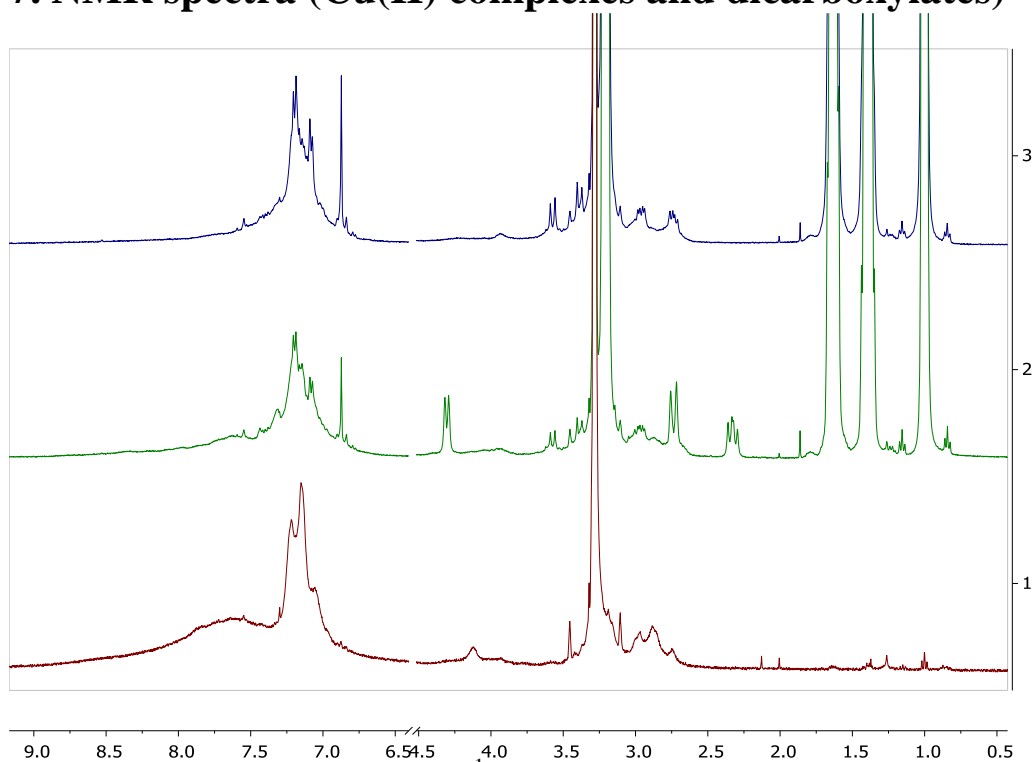

**Figure S71.** Selected regions of the  $^1\text{H-NMR}$  spectra (400 MHz,  $\text{CD}_3\text{OD}$ ) of  $\text{Cu}_2\text{L3}$  (bottom),  $\text{Cu}_2\text{L3}$  plus  $(\text{TBA})_2\text{-L-Malate}$  (middle) and  $\text{Cu}_2\text{L3}$  plus  $(\text{TBA})_2\text{-L-Aspartate}$  (top).

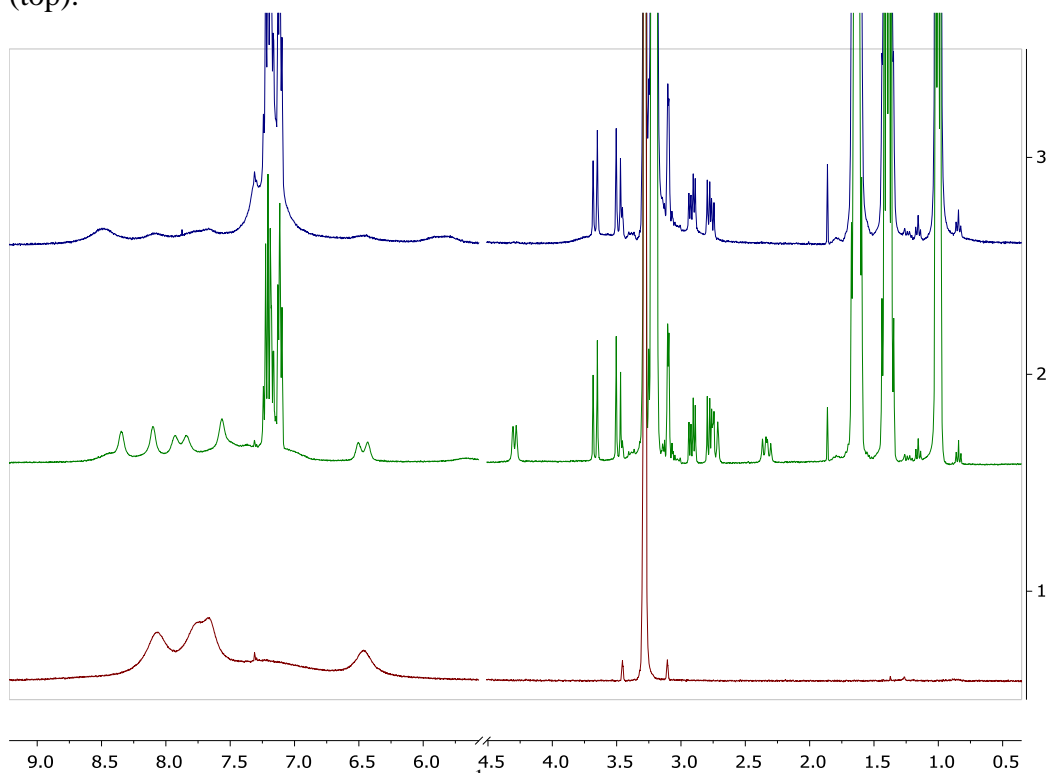

**Figure S72.** Selected regions of the  $^1\text{H-NMR}$  spectra (400 MHz,  $\text{CD}_3\text{OD}$ ) of  $\text{CuL1}$  (bottom),  $\text{CuL1}$  plus  $(\text{TBA})_2\text{-L-Malate}$  (middle) and  $\text{CuL1}$  plus  $(\text{TBA})_2\text{-L-Aspartate}$  (top).
